# Supplementary material
Source: publisher site journal article supplement (https://www.dovepress.com/article/394608)

Supplemental Table 1. Primers for quantitative real-time PCR.

| Gene    |         | Sequence 5'----3'(Mouse) |
|---------|---------|--------------------------|
| β-actin | Foward  | GGCTGTATTCCCCTCCATCG     |
|         | Reverse | CCAGTTGGTAACAATGCCATGT   |
| IDO1    | Foward  | GCTTTGCTCTACCACATCCAC    |
|         | Reverse | CAGGCGCTGTAACCTGTGT      |
| TDO2    | Foward  | ATGAGTGGGTGCCCGTTTG      |
|         | Reverse | GGCTCTGTTTACACCAGTTTGAG  |
| TPH     | Foward  | AACAAAGACCATTCTCCGAAAG   |
|         | Reverse | TGTAACAGGCTCACATGATTCTC  |
| AADC    | Foward  | TAGCTGACTATCTGGATGGCAT   |
|         | Reverse | GTCCTCGTATGTTTCTGGCTC    |
| SCD1    | Foward  | TTCTTGCGATACTCTGGTGC     |
|         | Reverse | CGGGATTGAATGTTCTTGTCGT   |
| FASN    | Foward  | GGAGGTGGTGATAGCCGGTAT    |
|         | Reverse | TGGGTAATCCATAGAGCCCAG    |
| IL-17A  | Foward  | TTTAACTCCCTTGGCGCAAAA    |

Reverse

CTTCCCTCCGCATTGACAC

Supplemental Table 2. Upregulated differential metabolites between the control group and the *Pneumocystis*-infected WT mice group under ESI- and ESI+ modes.

| No.                        | Compounds                                                                    | Class.I                         | Class.II                         | VIP  | p_value | Fold_Change | Log2FC | Type |
|----------------------------|------------------------------------------------------------------------------|---------------------------------|----------------------------------|------|---------|-------------|--------|------|
| <b>Positive ion (ESI+)</b> |                                                                              |                                 |                                  |      |         |             |        |      |
| 1                          | PE-NMe(14:0/18:1(11Z))                                                       | Lipids and lipid-like molecules | Glycerophospholipids             | 1.54 | 0.00    | 2.58        | 1.37   | up   |
| 2                          | PC(16:0/18:1(11Z))                                                           | Lipids and lipid-like molecules | Glycerophospholipids             | 1.35 | 0.01    | 4.39        | 2.13   | up   |
| 3                          | 1,2-Dipentadecanoyl-sn-glycero-3-phosphocholine                              | Lipids and lipid-like molecules | Glycerophospholipids             | 1.54 | 0.00    | 2.87        | 1.52   | up   |
| 4                          | PC(14:0/22:2(13Z,16Z))                                                       | Lipids and lipid-like molecules | Glycerophospholipids             | 1.79 | 0.00    | 6.22        | 2.64   | up   |
| 5                          | PC(20:2(11Z,14Z)/16:0)                                                       | Lipids and lipid-like molecules | Glycerophospholipids             | 1.38 | 0.01    | 3.72        | 1.89   | up   |
| 6                          | 9,10-Dihydroxystearate                                                       | Lipids and lipid-like molecules | Fatty Acyls                      | 1.36 | 0.01    | 2.07        | 1.05   | up   |
| 7                          | PC(14:0/20:1(11Z))                                                           | Lipids and lipid-like molecules | Glycerophospholipids             | 1.32 | 0.02    | 4.86        | 2.28   | up   |
| 8                          | 11-HpODE;<br>(9Z,12Z)-(11S)-11-Hydroperoxy<br>octadeca-9,12-dienoate         | Lipids and lipid-like molecules | Fatty Acyls                      | 1.40 | 0.01    | 2.19        | 1.13   | up   |
| 9                          | Toluene-cis-dihydrodiol;(1S,2R)-<br>3-Methylcyclohexa-3,5-diene-1,2<br>-diol | Organic oxygen compounds        | Organooxygen compounds           | 1.44 | 0.01    | 2.03        | 1.02   | up   |
| 10                         | PC(20:0/14:1(9Z))                                                            | Lipids and lipid-like molecules | Glycerophospholipids             | 1.33 | 0.01    | 2.03        | 1.02   | up   |
| 11                         | 5alpha-Androstane-3alpha,17beta<br>-diol                                     | Lipids and lipid-like molecules | Steroids and steroid derivatives | 1.30 | 0.01    | 2.48        | 1.31   | up   |
| 12                         | PA(20:2(11Z,14Z)/15:0)                                                       | Lipids and lipid-like molecules | Glycerophospholipids             | 1.49 | 0.00    | 2.55        | 1.35   | up   |
| 13                         | 11,14,15-THETA                                                               | Lipids and lipid-like molecules | Fatty Acyls                      | 1.27 | 0.02    | 2.83        | 1.50   | up   |
| 14                         | PC(18:1(11Z)/18:0)                                                           | Lipids and lipid-like molecules | Glycerophospholipids             | 1.23 | 0.03    | 2.66        | 1.41   | up   |

|    |                                  |                                         |                                  |      |      |      |      |    |  |
|----|----------------------------------|-----------------------------------------|----------------------------------|------|------|------|------|----|--|
|    | DG(22:1(13Z)/20:5(5Z,8Z,11Z,1    |                                         |                                  |      |      |      |      |    |  |
| 15 | 4Z,17Z)/0:0)                     | Lipids and lipid-like molecules         | Glycerolipids                    | 1.76 | 0.00 | 5.45 | 2.45 | up |  |
| 16 | PC(14:1(9Z)/22:0)                | Lipids and lipid-like molecules         | Glycerophospholipids             | 1.32 | 0.01 | 2.29 | 1.20 | up |  |
| 17 | Adenosine 5'-Monophosphate       | Nucleotide And Its metabolomics         | Nucleotide and Its metabolomics  | 1.36 | 0.01 | 3.07 | 1.62 | up |  |
| 18 | PE-NMe(16:0/20:0)                | Lipids and lipid-like molecules         | Glycerophospholipids             | 1.10 | 0.03 | 2.55 | 1.35 | up |  |
|    | DG(20:4(5Z,8Z,11Z,14Z)/22:5(4    |                                         |                                  |      |      |      |      |    |  |
| 19 | Z,7Z,10Z,13Z,16Z)/0:0)           | Lipids and lipid-like molecules         | Glycerolipids                    | 1.27 | 0.02 | 2.11 | 1.08 | up |  |
| 20 | Choline                          | Tryptamines,Cholines,Pigments           | Cholines                         | 1.31 | 0.01 | 2.22 | 1.15 | up |  |
| 21 | Inosine                          | Nucleotide And Its metabolomics         | Nucleotide and Its metabolomics  | 1.71 | 0.00 | 2.13 | 1.09 | up |  |
| 22 | 3-Hydroxybutyrylcarnitine        | Lipids and lipid-like molecules         | Fatty Acyls                      | 1.42 | 0.01 | 2.24 | 1.17 | up |  |
|    | DG(20:1(11Z)/20:5(5Z,8Z,11Z,1    |                                         |                                  |      |      |      |      |    |  |
| 23 | 4Z,17Z)/0:0)                     | Lipids and lipid-like molecules         | Glycerolipids                    | 1.32 | 0.02 | 2.72 | 1.44 | up |  |
| 24 | PA(21:0/12:0)                    | Lipids and lipid-like molecules         | Glycerophospholipids             | 1.40 | 0.02 | 2.08 | 1.06 | up |  |
| 25 | Crotonoside                      | Nucleosides, nucleotides, and analogues | Purine nucleosides               | 1.69 | 0.00 | 3.35 | 1.75 | up |  |
|    |                                  | Hormones and hormone related            | Hormones and hormone related     |      |      |      |      |    |  |
| 26 | Progesterone                     | compunds                                | compunds                         | 1.24 | 0.02 | 2.34 | 1.23 | up |  |
| 27 | Allopurinol                      | Nucleotide And Its metabolomics         | Nucleotide and Its metabolomics  | 1.71 | 0.00 | 2.02 | 1.01 | up |  |
| 28 | Cytidine                         | Nucleotide And Its metabolomics         | Nucleotide and Its metabolomics  | 1.52 | 0.00 | 2.27 | 1.18 | up |  |
| 29 | Cumaroylspermidine               | Phenylpropanoids and polyketides        | Cinnamic acids and derivatives   | 1.35 | 0.01 | 2.64 | 1.40 | up |  |
| 30 | (R)-Pantetheine                  | Organic acids and derivatives           | Carboxylic acids and derivatives | 1.73 | 0.00 | 2.14 | 1.10 | up |  |
| 31 | Tyr Ser Leu                      | --                                      | --                               | 1.29 | 0.02 | 8.85 | 3.15 | up |  |
| 32 | Pro Pro Ile                      | --                                      | --                               | 1.58 | 0.00 | 2.81 | 1.49 | up |  |
|    | Indole-3-acetaldehyde            |                                         |                                  |      |      |      |      |    |  |
|    | oxime;Indole-3-acetaldoxime;3-I  |                                         |                                  |      |      |      |      |    |  |
|    | ndoleacetaldoxime;(E)-Indol-3-yl |                                         |                                  |      |      |      |      |    |  |
| 33 | acetaldoxime                     | Organoheterocyclic compounds            | Indoles and derivatives          | 1.18 | 0.03 | 2.06 | 1.04 | up |  |

|    |                                                     |                                 |                                  |      |      |      |      |    |
|----|-----------------------------------------------------|---------------------------------|----------------------------------|------|------|------|------|----|
| 34 | Formyl-5-hydroxykynurenamine                        | Organic oxygen compounds        | Organooxygen compounds           | 1.19 | 0.05 | 2.58 | 1.37 | up |
| 35 | Propamocarb                                         | Organic acids and derivatives   | Carboxylic acids and derivatives | 1.18 | 0.03 | 2.35 | 1.24 | up |
|    |                                                     |                                 | Benzene and substituted          |      |      |      |      |    |
| 36 | Benzamidine                                         | Benzenoids                      | derivatives                      | 1.25 | 0.04 | 2.13 | 1.09 | up |
| 37 | LysoPA(16:0/0:0)                                    | Lipids and lipid-like molecules | Glycerophospholipids             | 1.23 | 0.04 | 4.45 | 2.16 | up |
|    | 1-Stearoyl-2-linoleoyl-sn-glycero                   |                                 |                                  |      |      |      |      |    |
| 38 | -3-phosphocholine                                   | Lipids and lipid-like molecules | Glycerophospholipids             | 1.16 | 0.03 | 2.79 | 1.48 | up |
| 39 | Phosphite                                           | Homogeneous non-metal compounds | Non-metal oxoanionic compounds   | 1.50 | 0.00 | 2.67 | 1.42 | up |
| 40 | Prostaglandin E2-1-glyceryl ester                   | Lipids and lipid-like molecules | Fatty Acyls                      | 1.23 | 0.03 | 2.42 | 1.27 | up |
| 41 | 7-(Methylthio)heptanenitrile                        | Organic nitrogen compounds      | Organonitrogen compounds         | 1.22 | 0.01 | 2.02 | 1.01 | up |
| 42 | 5-Geranoxy-7-methoxycoumarin                        | Lipids and lipid-like molecules | Prenol lipids                    | 1.45 | 0.00 | 2.52 | 1.33 | up |
|    | Phosphonic acid,<br>P-[[[(1R,2S)-2-aminocyclohexyl] |                                 |                                  |      |      |      |      |    |
| 43 | amino]carbonyl]-, rel-                              | Organic nitrogen compounds      | Organonitrogen compounds         | 1.67 | 0.00 | 2.41 | 1.27 | up |
| 44 | Noroxymorphone                                      | Benzenoids                      | Phenanthrenes and derivatives    | 1.15 | 0.04 | 2.03 | 1.02 | up |
| 45 | Leu-Gly                                             | Amino acid and Its metabolomics | Small Peptide                    | 1.40 | 0.01 | 2.14 | 1.10 | up |
| 46 | Trimethylamine oxide                                | Organic nitrogen compounds      | Organonitrogen compounds         | 1.39 | 0.01 | 8.27 | 3.05 | up |
| 47 | Pro Ile                                             | --                              | --                               | 1.65 | 0.00 | 2.78 | 1.48 | up |
| 48 | Farnesylthiosalicylic acid                          | Lipids and lipid-like molecules | Prenol lipids                    | 1.45 | 0.01 | 2.77 | 1.47 | up |
| 49 | Sitagliptin                                         | Organic acids and derivatives   | Carboxylic acids and derivatives | 1.50 | 0.00 | 2.50 | 1.32 | up |
| 50 | Pro Leu Val                                         | --                              | --                               | 1.63 | 0.00 | 2.46 | 1.30 | up |
| 51 | 8-Cyclopentyltheophylline                           | Organoheterocyclic compounds    | Imidazopyrimidines               | 1.44 | 0.00 | 2.04 | 1.03 | up |
|    |                                                     |                                 | Benzene and substituted          |      |      |      |      |    |
| 52 | Hydroxyzine                                         | Benzenoids                      | derivatives                      | 1.79 | 0.00 | 2.10 | 1.07 | up |
| 53 | Tyr Tyr Asp                                         | --                              | --                               | 1.11 | 0.04 | 4.00 | 2.00 | up |
| 54 | Trp Phe Arg                                         | --                              | --                               | 1.20 | 0.04 | 2.20 | 1.14 | up |



|    |                                                            |                                         |                                  |      |      |      |      |    |
|----|------------------------------------------------------------|-----------------------------------------|----------------------------------|------|------|------|------|----|
|    | 2'-Deoxyguanosine                                          |                                         |                                  |      |      |      |      |    |
| 2  | 5'-monophosphate                                           | Nucleosides, nucleotides, and analogues | Purine nucleotides               | 1.32 | 0.01 | 2.49 | 1.31 | up |
| 3  | Dihydroxyacetone                                           | Organic oxygen compounds                | Organooxygen compounds           | 1.24 | 0.02 | 3.45 | 1.79 | up |
| 4  | 2-Aminoethanesulfonic Acid                                 | Organic acid And Its derivatives        | Sulfonic acids                   | 1.35 | 0.01 | 2.22 | 1.15 | up |
| 5  | L-Lactic Acid                                              | Organic acid And Its derivatives        | Organic acid and Its derivatives | 1.25 | 0.02 | 3.17 | 1.66 | up |
| 6  | Guanosine                                                  | Nucleotide And Its metabolomics         | Nucleotide and Its metabolomics  | 1.54 | 0.00 | 2.03 | 1.02 | up |
| 7  | 4-hydroxybenzenesulfonic acid                              | Organic acid And Its derivatives        | Sulfonic acids                   | 1.36 | 0.01 | 2.09 | 1.06 | up |
| 8  | Hexanoyl Glycine                                           | Amino acid and Its metabolomics         | Amino acid derivatives           | 1.60 | 0.00 | 2.51 | 1.33 | up |
| 9  | 3'-Aenylic Acid                                            | Nucleotide And Its metabolomics         | Nucleotide and Its metabolomics  | 1.43 | 0.01 | 2.43 | 1.28 | up |
| 10 | PG(16:0/0:0)[U]                                            | --                                      | --                               | 1.32 | 0.01 | 2.11 | 1.08 | up |
| 11 | alpha-Bisabolol oxide C                                    | Organoheterocyclic compounds            | Oxanes                           | 1.57 | 0.00 | 4.68 | 2.23 | up |
| 12 | Uridine                                                    | Nucleotide And Its metabolomics         | Nucleotide and Its metabolomics  | 1.71 | 0.00 | 2.63 | 1.40 | up |
| 13 | Fast green FCF                                             | --                                      | --                               | 1.43 | 0.00 | 4.02 | 2.01 | up |
|    |                                                            |                                         | Benzene and substituted          |      |      |      |      |    |
| 14 | Glucotropaeolin                                            | Benzene and substituted derivatives     | derivatives                      | 1.33 | 0.01 | 2.45 | 1.29 | up |
| 15 | (±)13-HpODE                                                | Oxidized lipid                          | Oxidized lipid                   | 1.35 | 0.02 | 2.19 | 1.13 | up |
| 16 | 2-Hydroxy-2-methylbutyric acid                             | Organic acids                           | Organic acids                    | 1.37 | 0.01 | 2.69 | 1.43 | up |
| 17 | 4-Hydroxybenzoic Acid                                      | Phenolic acids                          | Phenolic acids                   | 1.35 | 0.01 | 2.03 | 1.02 | up |
| 18 | Lys Thr Gln Lys                                            | --                                      | --                               | 1.72 | 0.00 | 2.36 | 1.24 | up |
|    | Diethylstilbestrol<br>diphosphate; Fosfestrol; Diethylstil |                                         |                                  |      |      |      |      |    |
| 19 | bestrol bisphosphate                                       | Phenylpropanoids and polyketides        | Stilbenes                        | 1.32 | 0.01 | 2.85 | 1.51 | up |
|    |                                                            |                                         | Benzene and substituted          |      |      |      |      |    |
| 20 | Darunavir                                                  | Benzenoids                              | derivatives                      | 1.62 | 0.00 | 2.80 | 1.49 | up |
| 21 | N6-Succinyl Adenosine                                      | Nucleotide And Its metabolomics         | Nucleotide and Its metabolomics  | 1.22 | 0.03 | 2.92 | 1.54 | up |

Supplemental Table 3. Downregulated differential metabolites between the control group and *Pneumocystis*-infected WT mice group under ESI- and ESI+ modes.

| No.                        | Compounds                                                                                                                     | Class.I                                 | Class.II                         | VIP  | p_value | Fold_Change | Log2FC | Type |
|----------------------------|-------------------------------------------------------------------------------------------------------------------------------|-----------------------------------------|----------------------------------|------|---------|-------------|--------|------|
| <b>Positive ion (ESI+)</b> |                                                                                                                               |                                         |                                  |      |         |             |        |      |
| 1                          | PE-NMe2(20:5(5Z,8Z,11Z,14Z,17Z)/22:6(4Z,7Z,10Z,13Z,16Z,19Z))                                                                  | Lipids and lipid-like molecules         | Glycerophospholipids             | 1.73 | 0.00    | 0.46        | -1.13  | down |
| 2                          | (6E)-8-Oxogeraniol                                                                                                            | Lipids and lipid-like molecules         | Prenol lipids                    | 1.73 | 0.00    | 0.49        | -1.04  | down |
| 3                          | MG(0:0/18:1(9Z)/0:0)                                                                                                          | Lipids and lipid-like molecules         | Glycerolipids                    | 1.47 | 0.01    | 0.38        | -1.39  | down |
| 4                          | Atrazine                                                                                                                      | Heterocyclic compounds                  | Heterocyclic compounds           | 1.72 | 0.00    | 0.41        | -1.29  | down |
| 5                          | 2-Succinyl-5-enolpyruvyl-6-hydroxy-3-cyclohexene-1-carboxylate;5-Enolpyruvyl-6-hydroxy-2-succinylcyclohex-3-ene-1-carboxylate | Organic acids and derivatives           | Carboxylic acids and derivatives | 1.40 | 0.01    | 0.48        | -1.06  | down |
| 6                          | 2-acetamido-N-[(2S,4R)-4-hydroxy-2-(hydroxymethyl)-5-[6-(methylamino)purin-9-yl]oxolan-3-yl]-3-(4-hydroxyphenyl)propanamide   | Nucleosides, nucleotides, and analogues | Purine nucleosides               | 1.39 | 0.01    | 0.44        | -1.18  | down |
| 7                          | 20-oxo-leukotriene B4                                                                                                         | Lipids and lipid-like molecules         | Fatty Acyls                      | 1.53 | 0.00    | 0.34        | -1.54  | down |
| 8                          | (-)-endo-Fenchol;(-)-alpha-Fenchyl alcohol                                                                                    | Lipids and lipid-like molecules         | Prenol lipids                    | 1.21 | 0.02    | 0.39        | -1.34  | down |
| 9                          | 1,2,3,4,4a,7,7a,13-octahydro-4,12-methanobenzofuro[3,2-e]isoquinoline-7,9-diol                                                | Alkaloids and derivatives               | Morphinans                       | 1.16 | 0.02    | 0.49        | -1.04  | down |

|    |                                                                                                                                                        |                                         |                                                    |      |      |      |       |      |
|----|--------------------------------------------------------------------------------------------------------------------------------------------------------|-----------------------------------------|----------------------------------------------------|------|------|------|-------|------|
| 10 | Bufotenine                                                                                                                                             | Organoheterocyclic compounds            | Indoles and derivatives                            | 1.62 | 0.00 | 0.36 | -1.48 | down |
| 11 | TG(18:2(9Z,12Z)/20:5(5Z,8Z,11Z,14Z,17Z)/18:4(6Z,9Z,12Z,15Z))                                                                                           | Lipids and lipid-like molecules         | Glycerolipids                                      | 1.78 | 0.00 | 0.22 | -2.18 | down |
| 12 | 10,16-Dihydroxyhexadecanoic acid                                                                                                                       | Lipids and lipid-like molecules         | Fatty Acyls<br>Benzene and substituted derivatives | 1.41 | 0.01 | 0.48 | -1.05 | down |
| 13 | Phenylacetic acid                                                                                                                                      | Benzenoids                              | derivatives                                        | 1.65 | 0.00 | 0.45 | -1.15 | down |
| 14 | 3-Methyl-2-Oxobutanoic Acid                                                                                                                            | Organic acid And Its derivatives        | Organicacid and Its derivatives                    | 1.51 | 0.00 | 0.41 | -1.28 | down |
| 15 | Aflatoxin B1                                                                                                                                           | Phenylpropanoids and polyketides        | Coumarins and derivatives                          | 1.73 | 0.00 | 0.33 | -1.58 | down |
| 16 | (E)-2-Methylbutanal oxime                                                                                                                              | Organic nitrogen compounds              | Organonitrogen compounds                           | 1.72 | 0.00 | 0.47 | -1.08 | down |
| 17 | 2-Iminopropanoate<br>(1R,6R)-6-Hydroxy-2-succinylcyclohexa-2,4-diene-1-carboxylate;(1R,6R)-2-Succinyl-6-hydroxy-2,4-cyclohexadiene-1-carboxylate;SHCHC | Organic nitrogen compounds              | Organonitrogen compounds                           | 1.29 | 0.01 | 0.48 | -1.06 | down |
| 18 | oxylate;SHCHC                                                                                                                                          | Organic acids and derivatives           | Keto acids and derivatives                         | 1.57 | 0.00 | 0.44 | -1.18 | down |
| 19 | N-Formylidemecolcine                                                                                                                                   | Hydrocarbon derivatives                 | Tropones                                           | 1.77 | 0.00 | 0.32 | -1.63 | down |
| 20 | Caffeine                                                                                                                                               | Alkaloids                               | Alkaloids                                          | 1.73 | 0.00 | 0.25 | -2.01 | down |
| 21 | Val-Pro<br>(2S)-4-(2-aminophenyl)-2-azaniumyl-4-oxobutanoate                                                                                           | Organic acids and derivatives           | Carboxylic acids and derivatives                   | 1.64 | 0.00 | 0.32 | -1.63 | down |
| 22 | iumyl-4-oxobutanoate                                                                                                                                   | Organic oxygen compounds                | Organooxygen compounds                             | 1.26 | 0.03 | 0.36 | -1.49 | down |
| 23 | 2'-O-methyladenosine                                                                                                                                   | Nucleotide And Its metabolomics         | Nucleotide and Its metabolomics                    | 1.40 | 0.01 | 0.45 | -1.14 | down |
| 24 | 3'-Adenylic acid                                                                                                                                       | Nucleosides, nucleotides, and analogues | Ribonucleoside 3'-phosphates                       | 1.33 | 0.01 | 0.39 | -1.34 | down |
| 25 | Enoxolone                                                                                                                                              | Lipids and lipid-like molecules         | Prenol lipids                                      | 1.69 | 0.00 | 0.42 | -1.24 | down |
| 26 | 3"-Deamino-3"-hydroxykanamycin                                                                                                                         | Organic oxygen compounds                | Organooxygen compounds                             | 1.56 | 0.00 | 0.29 | -1.81 | down |



ycin B;Nebramycin factor 3

|    |                                     |                                     | <b>Benzene and substituted</b>   |      |      |      |       |      |  |
|----|-------------------------------------|-------------------------------------|----------------------------------|------|------|------|-------|------|--|
| 27 | Bisphenol A diglycidyl ether        | Benzenoids                          | derivatives                      | 1.74 | 0.00 | 0.36 | -1.46 | down |  |
| 28 | Gly Leu Arg Asn Gln                 | --                                  | --                               | 1.71 | 0.00 | 0.36 | -1.49 | down |  |
| 29 | Lys Lys Thr                         | --                                  | --                               | 1.52 | 0.01 | 0.24 | -2.09 | down |  |
| 30 | Asiatic acid                        | Lipids and lipid-like molecules     | Prenol lipids                    | 1.68 | 0.00 | 0.49 | -1.02 | down |  |
| 31 | 4,6-Dihydroxyquinoline              | Alkaloids                           | Quinoline alkaloids              | 1.42 | 0.02 | 0.05 | -4.28 | down |  |
|    | 4-(2-Aminophenyl)-2,4-dioxob        |                                     |                                  |      |      |      |       |      |  |
| 32 | utanoic acid                        | Organic oxygen compounds            | Organooxygen compounds           | 1.37 | 0.00 | 0.40 | -1.34 | down |  |
|    | Diphenylphosphine isopropyl         |                                     |                                  |      |      |      |       |      |  |
| 33 | ester                               | --                                  | --                               | 1.70 | 0.00 | 0.33 | -1.62 | down |  |
| 34 | Pro Arg Trp                         | --                                  | --                               | 1.66 | 0.00 | 0.25 | -2.00 | down |  |
| 35 | Ammelide                            | Organoheterocyclic compounds        | Triazines                        | 1.71 | 0.00 | 0.43 | -1.20 | down |  |
| 36 | Val Ser Ser Ser Leu                 | --                                  | --                               | 1.71 | 0.00 | 0.44 | -1.18 | down |  |
|    | 2-methoxy-1,7,9-trimethylpurin      |                                     |                                  |      |      |      |       |      |  |
| 37 | e-6,8-dione                         | Organoheterocyclic compounds        | Imidazopyrimidines               | 1.37 | 0.02 | 0.30 | -1.73 | down |  |
| 38 | Propylparaben                       | Benzene and substituted derivatives | Phenolic acids                   | 1.53 | 0.00 | 0.37 | -1.44 | down |  |
| 39 | 3 $\beta$ -Hydroxy-5-cholenoic acid | Lipids and lipid-like molecules     | Steroids and steroid derivatives | 1.72 | 0.00 | 0.47 | -1.09 | down |  |
| 40 | 2-Oxoglutaric acid                  | Organic acids and derivatives       | Keto acids and derivatives       | 1.31 | 0.01 | 0.47 | -1.08 | down |  |
| 41 | Chenodeoxycholic acid               | Lipids and lipid-like molecules     | Steroids and steroid derivatives | 1.69 | 0.00 | 0.49 | -1.04 | down |  |
|    |                                     |                                     | <b>Benzene and substituted</b>   |      |      |      |       |      |  |
| 42 | 4-Anisaldehyde                      | Benzenoids                          | derivatives                      | 1.68 | 0.00 | 0.46 | -1.12 | down |  |
| 43 | L-Homoarginine                      | Amino acids and derivatives         | Amino acids and derivatives      | 1.69 | 0.00 | 0.47 | -1.08 | down |  |
| 44 | Carnitine C5:0                      | FA                                  | CAR                              | 1.67 | 0.00 | 0.38 | -1.38 | down |  |
| 45 | Kynurenine                          | Amino acid and Its metabolomics     | Amino acid derivatives           | 1.55 | 0.00 | 0.46 | -1.13 | down |  |
| 46 | PA(i-21:0/a-15:0)                   | Lipids and lipid-like molecules     | Glycerophospholipids             | 1.77 | 0.00 | 0.42 | -1.25 | down |  |

|    |                                                                                                                                                                     |                                 |                                   |      |      |      |       |      |  |
|----|---------------------------------------------------------------------------------------------------------------------------------------------------------------------|---------------------------------|-----------------------------------|------|------|------|-------|------|--|
|    |                                                                                                                                                                     |                                 | Benzene and substituted           |      |      |      |       |      |  |
| 47 | Fenobucarb                                                                                                                                                          | Benzenoids                      | derivatives                       | 1.33 | 0.03 | 0.28 | -1.83 | down |  |
| 48 | Leu Ser Asn<br>(1R,2S,3S,4S,5S,8R,9R,12R)-5<br>-hydroxy-4-methyl-13-methyl<br>denetetracyclo[10.2.1.01,9.03,8<br>]pentadecane-2,4,8-tricarboxyli<br>c acid          | --                              | --                                | 1.72 | 0.00 | 0.43 | -1.22 | down |  |
| 49 | Asp Gln Asn Asp                                                                                                                                                     | Lipids and lipid-like molecules | Prenol lipids                     | 1.49 | 0.01 | 0.31 | -1.70 | down |  |
| 50 | Cortisone                                                                                                                                                           | --                              | --                                | 1.67 | 0.00 | 0.41 | -1.27 | down |  |
| 51 | Retinoic Acid                                                                                                                                                       | Lipids and lipid-like molecules | Steroids and steroid derivatives  | 1.64 | 0.00 | 0.48 | -1.05 | down |  |
| 52 | Butyl Phosphorotrithioate                                                                                                                                           | Lipids and lipid-like molecules | Prenol lipids                     | 1.07 | 0.04 | 0.49 | -1.04 | down |  |
| 53 | Val His Ile                                                                                                                                                         | Organophosphorus compounds      | Organothiophosphorus<br>compounds | 1.35 | 0.02 | 0.31 | -1.68 | down |  |
| 54 | PE-NMe(15:0/18:4(6Z,9Z,12Z,<br>15Z))                                                                                                                                | --                              | --                                | 1.64 | 0.00 | 0.30 | -1.75 | down |  |
| 55 | Ile Pro Tyr                                                                                                                                                         | Lipids and lipid-like molecules | Glycerophospholipids              | 1.43 | 0.01 | 0.50 | -1.01 | down |  |
| 56 | Feruloylcholine                                                                                                                                                     | --                              | --                                | 1.65 | 0.00 | 0.49 | -1.02 | down |  |
| 57 | Ser Gly Ala Asn Lys                                                                                                                                                 | Alkaloids                       | Alkaloids                         | 1.65 | 0.00 | 0.47 | -1.09 | down |  |
| 58 | benzyl<br>4-(1,3-dioxoisindolin-2-yl)-2',<br>2'-dimethyl-3',5-dioxo-2',3',4,5-<br>tetrahydro-3H-spiro[furan-2,9'-<br>imidazo[1,2-a]indole]-1'(9a'H)-<br>carboxylate | --                              | --                                | 1.66 | 0.00 | 0.29 | -1.77 | down |  |
| 59 | Carpropamid                                                                                                                                                         | --                              | --                                | 1.61 | 0.00 | 0.42 | -1.25 | down |  |
| 60 |                                                                                                                                                                     | Benzenoids                      | Benzene and substituted           | 1.65 | 0.00 | 0.40 | -1.32 | down |  |

|    |                                                                                                                   |                                  |                                        |      |      |      |       |      |  |
|----|-------------------------------------------------------------------------------------------------------------------|----------------------------------|----------------------------------------|------|------|------|-------|------|--|
|    |                                                                                                                   |                                  | derivatives                            |      |      |      |       |      |  |
| 61 | PA(21:0/i-15:0)<br>4-Coumaroylshikimate;trans-5-                                                                  | Lipids and lipid-like molecules  | Glycerophospholipids                   | 1.81 | 0.00 | 0.32 | -1.65 | down |  |
| 62 | O-(4-Coumaroyl)shikimate                                                                                          | Phenylpropanoids and polyketides | Cinnamic acids and derivatives         | 1.68 | 0.00 | 0.26 | -1.93 | down |  |
| 63 | Goshonoside F2                                                                                                    | Lipids and lipid-like molecules  | Prenol lipids                          | 1.21 | 0.03 | 0.50 | -1.01 | down |  |
| 64 | 1,24-Dihydroxyvitamin D3                                                                                          | Lipids and lipid-like molecules  | Steroids and steroid derivatives       | 1.38 | 0.02 | 0.19 | -2.38 | down |  |
| 65 | Leu Ala Tyr<br>Hydroxyspirilloxanthin;Monod                                                                       | --                               | --                                     | 1.57 | 0.00 | 0.41 | -1.28 | down |  |
| 66 | emethyl spirilloxanthin                                                                                           | Lipids and lipid-like molecules  | Prenol lipids                          | 1.67 | 0.00 | 0.31 | -1.69 | down |  |
| 67 | Normeperidine<br>(4S,4aS,12aR)-4-azaniumyl-2-c<br>arbamoyl-10,11,12a-trihydroxy<br>-6-methyl-3,12-dioxo-4a,5-dihy | Organoheterocyclic compounds     | Piperidines                            | 1.40 | 0.02 | 0.05 | -4.20 | down |  |
| 68 | dro-4H-tetracen-1-olate                                                                                           | --                               | --                                     | 1.67 | 0.00 | 0.42 | -1.24 | down |  |
| 69 | N-Acetyl-5-Hydroxytryptamine                                                                                      | Tryptamines,Cholines,Pigments    | Tryptamines                            | 1.62 | 0.00 | 0.30 | -1.74 | down |  |
| 70 | Fluazifop-butyl<br>N-[4-[3,5-Bis(trifluoromethyl)p<br>yrazol-1-yl]phenyl]-4-methylth                              | Benzenoids                       | Benzene and substituted<br>derivatives | 1.64 | 0.00 | 0.45 | -1.15 | down |  |
| 71 | iadiazole-5-carboxamide<br>N,N-Diethyl-3-methylbenzami                                                            | Benzenoids                       | Benzene and substituted<br>derivatives | 1.45 | 0.00 | 0.48 | -1.06 | down |  |
| 72 | de<br>20-Hydroxy-3,7,11,15,23-penta                                                                               | Benzenoids                       | derivatives                            | 1.74 | 0.00 | 0.43 | -1.22 | down |  |
| 73 | oxolanost-8-en-26-oic acid                                                                                        | Lipids and lipid-like molecules  | Prenol lipids                          | 1.69 | 0.00 | 0.41 | -1.30 | down |  |
| 74 | D-Pantothenoyl-L-cysteine                                                                                         | Organic acids and derivatives    | Peptidomimetics                        | 1.62 | 0.00 | 0.30 | -1.73 | down |  |
| 75 | Thr His Ala                                                                                                       | --                               | --                                     | 1.72 | 0.00 | 0.48 | -1.07 | down |  |

|    |                                                                        |                                  |                                          |      |      |      |       |      |
|----|------------------------------------------------------------------------|----------------------------------|------------------------------------------|------|------|------|-------|------|
| 76 | Isonicotinamide                                                        | Organoheterocyclic compounds     | Pyridines and derivatives                | 1.66 | 0.00 | 0.38 | -1.40 | down |
| 77 | Ritalinic acid                                                         | Organic acid And Its derivatives | Organicacid and Its derivatives          | 1.53 | 0.00 | 0.43 | -1.23 | down |
| 78 | Carbinoxamine                                                          | Benzenoids                       | Benzene and substituted derivatives      | 1.72 | 0.00 | 0.46 | -1.12 | down |
|    | 5-(Methylthio)-N-(3-pyridyl)-6-(trifluoromethyl)indoline-1-carboxamide |                                  |                                          |      |      |      |       |      |
| 79 | boxamide                                                               | Organoheterocyclic compounds     | Indoles and derivatives                  | 1.35 | 0.01 | 0.40 | -1.34 | down |
| 80 | Ala Asp Arg Arg                                                        | --                               | --                                       | 1.69 | 0.00 | 0.43 | -1.22 | down |
|    | Coumarin-suberoylanilide                                               |                                  |                                          |      |      |      |       |      |
| 81 | hydroxamic acid                                                        | Phenylpropanoids and polyketides | Coumarins and derivatives                | 1.73 | 0.00 | 0.41 | -1.29 | down |
| 82 | Albendazole oxide                                                      | Organoheterocyclic compounds     | Benzimidazoles                           | 1.71 | 0.00 | 0.50 | -1.00 | down |
| 83 | Monoethyl phthalate                                                    | Benzenoids                       | Benzene and substituted derivatives      | 1.64 | 0.00 | 0.45 | -1.16 | down |
| 84 | Aflatoxin B2                                                           | Phenylpropanoids and polyketides | Coumarins and derivatives                | 1.69 | 0.00 | 0.46 | -1.12 | down |
|    | N-Cbz-L-phenylalanyl-chloromethane                                     |                                  | Benzene and substituted derivatives      |      |      |      |       |      |
| 85 | ethane                                                                 | Benzenoids                       | derivatives                              | 1.58 | 0.00 | 0.31 | -1.69 | down |
| 86 | Phosphamidon                                                           | Organic acids and derivatives    | Organic phosphoric acids and derivatives | 1.68 | 0.00 | 0.41 | -1.30 | down |
|    |                                                                        |                                  | Benzene and substituted derivatives      |      |      |      |       |      |
| 87 | Bezafibrate                                                            | Benzenoids                       | derivatives                              | 1.61 | 0.00 | 0.23 | -2.10 | down |
| 88 | 4-Pyridylthioamide                                                     | Organoheterocyclic compounds     | Pyridines and derivatives                | 1.71 | 0.00 | 0.40 | -1.34 | down |
| 89 | Tiotropium                                                             | --                               | --                                       | 1.35 | 0.02 | 0.33 | -1.61 | down |
|    | N5-(1-Imino-3-butenyl)-L-ornithine                                     |                                  |                                          |      |      |      |       |      |
| 90 | hine                                                                   | Organic acids and derivatives    | Carboxylic acids and derivatives         | 1.48 | 0.01 | 0.43 | -1.23 | down |
| 91 | Citrinin                                                               | Organoheterocyclic compounds     | Benzopyrans                              | 1.63 | 0.00 | 0.41 | -1.28 | down |
| 92 | Flufenacet                                                             | Benzenoids                       | Benzene and substituted                  | 1.35 | 0.01 | 0.34 | -1.54 | down |

|     |                                |                                         |                               |      |      |      |       |      |  |
|-----|--------------------------------|-----------------------------------------|-------------------------------|------|------|------|-------|------|--|
|     |                                |                                         | derivatives                   |      |      |      |       |      |  |
| 93  | Ala Thr Ile Lys                | --                                      | --                            | 1.61 | 0.00 | 0.37 | -1.42 | down |  |
| 94  | 2-Aminobenzimidazole           | Organoheterocyclic compounds            | Benzimidazoles                | 1.49 | 0.01 | 0.36 | -1.46 | down |  |
| 95  | Nifurtimox                     | Organoheterocyclic compounds            | Furans                        | 1.50 | 0.00 | 0.42 | -1.24 | down |  |
|     |                                |                                         | Benzene and substituted       |      |      |      |       |      |  |
| 96  | 4,5-diphenyl-1,2,3-Thiadiazole | Benzenoids                              | derivatives                   | 1.22 | 0.03 | 0.33 | -1.59 | down |  |
| 97  | Trp Val Arg                    | --                                      | --                            | 1.35 | 0.01 | 0.47 | -1.08 | down |  |
| 98  | 9-Phenanthrol                  | Benzenoids                              | Phenanthrenes and derivatives | 1.55 | 0.00 | 0.47 | -1.09 | down |  |
|     | (2E)-3-(4-hydroxyphenyl)-1-ph  |                                         |                               |      |      |      |       |      |  |
| 99  | enylprop-2-en-1-one            | Phenylpropanoids and polyketides        | Linear 1,3-diarylpropanoids   | 1.40 | 0.02 | 0.33 | -1.61 | down |  |
| 100 | Pseudoephedrine                | Alkaloids                               | Amphetamine alkaloids         | 1.65 | 0.00 | 0.44 | -1.19 | down |  |
| 101 | 4-pentyn-1-ol                  | Acetylides                              | --                            | 1.59 | 0.00 | 0.40 | -1.32 | down |  |
|     |                                |                                         | Benzene and substituted       |      |      |      |       |      |  |
| 102 | Norsufentanil                  | Benzenoids                              | derivatives                   | 1.73 | 0.00 | 0.39 | -1.35 | down |  |
| 103 | Val Val Leu                    | --                                      | --                            | 1.67 | 0.00 | 0.45 | -1.16 | down |  |
|     | Aniline; LC-ESI-QTOF; MS2;     |                                         |                               |      |      |      |       |      |  |
| 104 | CE                             | --                                      | --                            | 1.70 | 0.00 | 0.49 | -1.04 | down |  |
|     |                                |                                         | Benzene and substituted       |      |      |      |       |      |  |
| 105 | Ethiofencarb                   | Benzenoids                              | derivatives                   | 1.61 | 0.00 | 0.29 | -1.78 | down |  |
|     | (5-Amino-1H-1,2,4-triazol-3-yl |                                         |                               |      |      |      |       |      |  |
| 106 | )methanol                      | Organoheterocyclic compounds            | Azoles                        | 1.33 | 0.01 | 0.43 | -1.22 | down |  |
|     |                                |                                         | Triazole ribonucleosides and  |      |      |      |       |      |  |
| 107 | Ribavirin                      | Nucleosides, nucleotides, and analogues | ribonucleotides               | 1.51 | 0.00 | 0.42 | -1.26 | down |  |
| 108 | Pro Glu Tyr                    | --                                      | --                            | 1.69 | 0.00 | 0.42 | -1.25 | down |  |
|     |                                |                                         | Organic sulfonic acids and    |      |      |      |       |      |  |
| 109 | Acamprosate                    | Organic acids and derivatives           | derivatives                   | 1.46 | 0.01 | 0.41 | -1.30 | down |  |

|     |                                                                                                 |                                 |                                        |      |      |      |       |      |
|-----|-------------------------------------------------------------------------------------------------|---------------------------------|----------------------------------------|------|------|------|-------|------|
| 110 | Val Asn Asp<br>Myristyltrimethylaminium<br>bromide;Tetradecyltrimethylam<br>monium bromide;MTAB | --                              | --                                     | 1.71 | 0.00 | 0.46 | -1.12 | down |
| 111 |                                                                                                 | Organic nitrogen compounds      | Organonitrogen compounds               | 1.63 | 0.00 | 0.48 | -1.05 | down |
| 112 | Bispyribac                                                                                      | Organic oxygen compounds        | Organooxygen compounds                 | 1.54 | 0.01 | 0.22 | -2.19 | down |
| 113 | Fentrazamide                                                                                    | Organoheterocyclic compounds    | Azoles                                 | 1.68 | 0.00 | 0.45 | -1.14 | down |
| 114 | Gly Phe Asp                                                                                     | --                              | --                                     | 1.47 | 0.01 | 0.31 | -1.69 | down |
| 115 | Bensultap                                                                                       | Benzenoids                      | Benzene and substituted<br>derivatives | 1.56 | 0.00 | 0.27 | -1.92 | down |
| 116 | P-Aminohippuric Acid                                                                            | Amino acid and Its metabolomics | Amino acid derivatives                 | 1.74 | 0.00 | 0.37 | -1.45 | down |
| 117 | TyrMe-Asp-OH                                                                                    | --                              | --                                     | 1.52 | 0.00 | 0.29 | -1.77 | down |
| 118 | Picoxystrobin                                                                                   | Benzenoids                      | Benzene and substituted<br>derivatives | 1.34 | 0.01 | 0.33 | -1.58 | down |
| 119 | Leu-Tyr                                                                                         | Organic acids and derivatives   | Carboxylic acids and derivatives       | 1.48 | 0.00 | 0.43 | -1.23 | down |
| 120 | Nocodazole                                                                                      | Organoheterocyclic compounds    | Benzimidazoles                         | 1.66 | 0.00 | 0.19 | -2.39 | down |
| 121 | Westiellamide                                                                                   | Organic acids and derivatives   | Carboxylic acids and derivatives       | 1.71 | 0.00 | 0.49 | -1.03 | down |
| 122 | Pro Pro Gly                                                                                     | --                              | --                                     | 1.55 | 0.00 | 0.48 | -1.06 | down |
| 123 | Ser Phe Lys<br>2-Methylamino-1-(3,4-methyle<br>nedioxyphenyl)butan-1-one                        | --                              | --                                     | 1.64 | 0.00 | 0.50 | -1.01 | down |
| 124 |                                                                                                 | Benzenoids                      | Benzene and substituted<br>derivatives | 1.77 | 0.00 | 0.44 | -1.19 | down |
| 125 | D-Arginine                                                                                      | Organic acids and derivatives   | Carboxylic acids and derivatives       | 1.69 | 0.00 | 0.42 | -1.26 | down |
| 126 | BUTACAINE                                                                                       | --                              | --                                     | 1.70 | 0.00 | 0.48 | -1.06 | down |
| 127 | Seneciophyllin                                                                                  | Alkaloids and derivatives       | --                                     | 1.71 | 0.00 | 0.42 | -1.27 | down |
| 128 | Pro Val Phe                                                                                     | --                              | --                                     | 1.24 | 0.01 | 0.46 | -1.11 | down |
| 129 | Asp His Met                                                                                     | --                              | --                                     | 1.16 | 0.02 | 0.48 | -1.05 | down |
| 130 | Treprostinil                                                                                    | Benzenoids                      | Benzene and substituted                | 1.64 | 0.00 | 0.40 | -1.31 | down |

|     |                                                            |                                         |                                  |      |      |      |       |      |
|-----|------------------------------------------------------------|-----------------------------------------|----------------------------------|------|------|------|-------|------|
|     |                                                            |                                         | derivatives                      |      |      |      |       |      |
| 131 | Bromopride                                                 | Benzenoids                              | Phenol ethers                    | 1.66 | 0.00 | 0.31 | -1.67 | down |
| 132 | Monoethylglycinexylidide                                   | Organic acids and derivatives           | Carboxylic acids and derivatives | 1.53 | 0.01 | 0.25 | -2.02 | down |
| 133 | Carnosine                                                  | Organic acids and derivatives           | Peptidomimetics                  | 1.70 | 0.00 | 0.47 | -1.09 | down |
|     |                                                            |                                         | Benzene and substituted          |      |      |      |       |      |
| 134 | Formetanate                                                | Benzenoids                              | derivatives                      | 1.79 | 0.00 | 0.34 | -1.55 | down |
| 135 | Carminic acid                                              | --                                      | --                               | 1.56 | 0.00 | 0.36 | -1.46 | down |
| 136 | Gly Leu Arg Val Phe                                        | --                                      | --                               | 1.74 | 0.00 | 0.49 | -1.02 | down |
| 137 | 2-Butyl-4-methylphenol                                     | Benzenoids                              | Phenols                          | 1.52 | 0.00 | 0.38 | -1.40 | down |
| 138 | Tacrine                                                    | Organoheterocyclic compounds            | Quinolines and derivatives       | 1.70 | 0.00 | 0.36 | -1.46 | down |
| 139 | Trehalose 6-phosphate                                      | Others                                  | Saccharides and Alcohols         | 1.64 | 0.00 | 0.31 | -1.67 | down |
| 140 | Hexobarbital                                               | Organoheterocyclic compounds            | Diazines                         | 1.50 | 0.00 | 0.44 | -1.18 | down |
| 141 | Arg Gln Arg                                                | --                                      | --                               | 1.65 | 0.00 | 0.49 | -1.03 | down |
|     |                                                            |                                         | Benzene and substituted          |      |      |      |       |      |
| 142 | Tebufenpyrad                                               | Benzenoids                              | derivatives                      | 1.66 | 0.00 | 0.20 | -2.34 | down |
| 143 | Asp His Phe                                                | --                                      | --                               | 1.44 | 0.01 | 0.47 | -1.08 | down |
| 144 | His Tyr Ile Asp                                            | --                                      | --                               | 1.10 | 0.03 | 0.48 | -1.06 | down |
| 145 | Cys Glu Lys                                                | --                                      | --                               | 1.61 | 0.00 | 0.32 | -1.62 | down |
|     |                                                            |                                         | Benzene and substituted          |      |      |      |       |      |
| 146 | (4-Chlorophenyl)biguanide                                  | Benzenoids                              | derivatives                      | 1.46 | 0.00 | 0.35 | -1.53 | down |
| 147 | Ala Pro Met                                                | --                                      | --                               | 1.56 | 0.01 | 0.22 | -2.17 | down |
|     | L-Threonylcarbamoyladenylate<br>;L-Threonylcarbamoyl-AMP;T |                                         |                                  |      |      |      |       |      |
| 148 | C-AMP                                                      | Nucleosides, nucleotides, and analogues | Purine nucleotides               | 1.40 | 0.02 | 0.27 | -1.89 | down |
|     |                                                            |                                         | Benzene and substituted          |      |      |      |       |      |
| 149 | Dexmedetomidine                                            | Benzenoids                              | derivatives                      | 1.73 | 0.00 | 0.36 | -1.48 | down |

|     |                                                                                                                           |                                         |                                  |      |      |      |       |      |
|-----|---------------------------------------------------------------------------------------------------------------------------|-----------------------------------------|----------------------------------|------|------|------|-------|------|
| 150 | Cys Tyr Thr                                                                                                               | --                                      | --                               | 1.53 | 0.00 | 0.44 | -1.17 | down |
| 151 | Carnitine C14:1                                                                                                           | FA                                      | CAR                              | 1.55 | 0.01 | 0.22 | -2.19 | down |
|     |                                                                                                                           |                                         | Benzene and substituted          |      |      |      |       |      |
| 152 | Emopamil<br>1H-1,4-Diazepine,<br>4-(aminoacetyl)hexahydro-2-m<br>ethyl-1-[(4-methyl-5-isoquinoli<br>nyl)sulfonyl]-, (2S)- | Benzenoids                              | derivatives                      | 1.72 | 0.00 | 0.48 | -1.06 | down |
| 153 | Demethoxykanugin                                                                                                          | Organic acids and derivatives           | Carboxylic acids and derivatives | 1.49 | 0.01 | 0.24 | -2.03 | down |
| 154 | Tyr Cys Leu                                                                                                               | Phenylpropanoids and polyketides        | Flavonoids                       | 1.69 | 0.00 | 0.45 | -1.15 | down |
| 155 | Genistein                                                                                                                 | --                                      | --                               | 1.50 | 0.00 | 0.45 | -1.15 | down |
| 156 | Iprovalicarb                                                                                                              | Flavonoids                              | Isoflavones                      | 1.60 | 0.00 | 0.34 | -1.55 | down |
|     |                                                                                                                           |                                         | Benzene and substituted          |      |      |      |       |      |
| 157 | Gln-Gly                                                                                                                   | Benzenoids                              | derivatives                      | 1.70 | 0.00 | 0.47 | -1.08 | down |
| 158 | Rolipram                                                                                                                  | --                                      | --                               | 1.32 | 0.03 | 0.27 | -1.91 | down |
| 159 | Cys Phe Lys                                                                                                               | Organoheterocyclic compounds            | Pyrrolidines                     | 1.65 | 0.00 | 0.46 | -1.12 | down |
| 160 | Alloxydim                                                                                                                 | --                                      | --                               | 1.48 | 0.01 | 0.47 | -1.10 | down |
| 161 | Cucurbitacin I                                                                                                            | Organic oxygen compounds                | Organooxygen compounds           | 1.52 | 0.01 | 0.33 | -1.60 | down |
| 162 | Simetryn                                                                                                                  | Lipids and lipid-like molecules         | Steroids and steroid derivatives | 1.68 | 0.00 | 0.46 | -1.11 | down |
| 163 | L-Homocystine                                                                                                             | Organoheterocyclic compounds            | Triazines                        | 1.56 | 0.00 | 0.43 | -1.23 | down |
| 164 | Epoxiconazole                                                                                                             | Amino acid and Its metabolomics         | Amino acids                      | 1.64 | 0.00 | 0.21 | -2.24 | down |
| 165 | (2Z)-((4R,5S,6S)-6-(β-D-Gluco<br>pyranosyloxy)-4,5-dihydroxy<br>clohex-2-en-1-ylidene)acetonitr                           | Phenylpropanoids and polyketides        | Stilbenes                        | 1.61 | 0.00 | 0.28 | -1.85 | down |
| 166 | ile                                                                                                                       | Organic oxygen compounds                | Organooxygen compounds           | 1.57 | 0.00 | 0.49 | -1.02 | down |
| 167 | 6-Furfurylaminopurine riboside                                                                                            | Nucleosides, nucleotides, and analogues | Purine nucleosides               | 1.46 | 0.01 | 0.35 | -1.51 | down |



|     |                                                                                                                               |                                  |                                        |      |      |      |       |      |  |
|-----|-------------------------------------------------------------------------------------------------------------------------------|----------------------------------|----------------------------------------|------|------|------|-------|------|--|
|     | (3S,7R)-11-methoxy-3,7-dimethyl-6,8,16,20-tetraoxapentacyclo[10.8.0.0.0.2,9.0.3,7.0.13,18]icosa-1,4,9,11,13(18)-pentaene-17,1 |                                  |                                        |      |      |      |       |      |  |
| 168 | 9-dione                                                                                                                       | Phenylpropanoids and polyketides | Coumarins and derivatives              | 1.54 | 0.00 | 0.26 | -1.93 | down |  |
| 169 | Avicularin                                                                                                                    | Phenylpropanoids and polyketides | Flavonoids                             | 1.47 | 0.01 | 0.33 | -1.58 | down |  |
|     |                                                                                                                               |                                  | Benzene and substituted                |      |      |      |       |      |  |
| 170 | 2-Aminoethyl diphenylborinate                                                                                                 | Benzenoids                       | derivatives                            | 1.08 | 0.05 | 0.44 | -1.18 | down |  |
| 171 | Byakangelicol                                                                                                                 | Phenylpropanoids and polyketides | Coumarins and derivatives              | 1.49 | 0.01 | 0.43 | -1.23 | down |  |
| 172 | Val Trp Ile                                                                                                                   | --                               | --                                     | 1.57 | 0.00 | 0.25 | -1.97 | down |  |
| 173 | 7-Chloro-6-[4-(diethylamino)phenyl]quinoline-5,8-dione                                                                        | Organoheterocyclic compounds     | Quinolines and derivatives             | 1.62 | 0.00 | 0.40 | -1.32 | down |  |
| 174 | 2-Amino-3-(3-methylbut-2-enylthio)propionic acid                                                                              | Organic acids and derivatives    | Carboxylic acids and derivatives       | 1.77 | 0.00 | 0.37 | -1.43 | down |  |
| 175 | Thiodicarb                                                                                                                    | Organic acids and derivatives    | Organic carbonic acids and derivatives | 1.35 | 0.01 | 0.49 | -1.04 | down |  |
| 176 | Triphenyl phosphate                                                                                                           | Aldehyde,Ketones,Esters          | Esters                                 | 1.59 | 0.00 | 0.28 | -1.82 | down |  |
| 177 | Thr-His                                                                                                                       | Organic acids and derivatives    | Carboxylic acids and derivatives       | 1.69 | 0.00 | 0.48 | -1.06 | down |  |
| 178 | Coumafuryl                                                                                                                    | Phenylpropanoids and polyketides | Coumarins and derivatives              | 1.62 | 0.00 | 0.28 | -1.84 | down |  |
| 179 | Lupinine                                                                                                                      | Alkaloids and derivatives        | Lupin alkaloids                        | 1.58 | 0.00 | 0.29 | -1.78 | down |  |
| 180 | 3,4-Dimethoxycinnamic acid                                                                                                    | Phenolic acids                   | Phenolic acids                         | 1.71 | 0.00 | 0.44 | -1.17 | down |  |
| 181 | Nitrazepam                                                                                                                    | Organoheterocyclic compounds     | Benzodiazepines                        | 1.62 | 0.00 | 0.19 | -2.37 | down |  |
| 182 | [4,5,7-trihydroxy-2-(3,4,5-trihydroxyphenyl)-3,4-dihydro-2H-1-benzopyran-3-yl]oxidanesulfonic acid                            | Phenylpropanoids and polyketides | Flavonoids                             | 1.50 | 0.01 | 0.29 | -1.79 | down |  |

|     |                                                                                                                                                                                                                        |                                  |                                           |      |      |      |       |      |
|-----|------------------------------------------------------------------------------------------------------------------------------------------------------------------------------------------------------------------------|----------------------------------|-------------------------------------------|------|------|------|-------|------|
| 183 | Thifensulfuron-methyl<br>1-(2,4-Dichlorophenyl)-2-(1-im                                                                                                                                                                | Organoheterocyclic compounds     | Thiophenes                                | 1.47 | 0.00 | 0.48 | -1.06 | down |
| 184 | idazolyl)ethanol                                                                                                                                                                                                       | Benzenoids                       | Benzene and substituted<br>derivatives    | 1.51 | 0.01 | 0.30 | -1.75 | down |
| 185 | Reticulataxanthin                                                                                                                                                                                                      | Lipids and lipid-like molecules  | Prenol lipids                             | 1.40 | 0.02 | 0.24 | -2.05 | down |
| 186 | Metixene                                                                                                                                                                                                               | Organoheterocyclic compounds     | Benzothiopyrans                           | 1.73 | 0.00 | 0.33 | -1.62 | down |
| 187 | (+)-Isocorydine                                                                                                                                                                                                        | Alkaloids and derivatives        | Aporphines                                | 1.47 | 0.01 | 0.26 | -1.94 | down |
| 188 | Iridin                                                                                                                                                                                                                 | Phenylpropanoids and polyketides | Isoflavonoids                             | 1.62 | 0.00 | 0.42 | -1.24 | down |
| 189 | Velcorin                                                                                                                                                                                                               | Organic acids and derivatives    | Organic carbonic acids and<br>derivatives | 1.69 | 0.00 | 0.42 | -1.27 | down |
| 190 | $\alpha$ -Carboxybenzylpenicillin                                                                                                                                                                                      | Organic acids and derivatives    | Carboxylic acids and derivatives          | 1.62 | 0.00 | 0.49 | -1.02 | down |
| 191 | Tyr Gly Gly                                                                                                                                                                                                            | --                               | --                                        | 1.68 | 0.00 | 0.39 | -1.36 | down |
| 192 | Methoxyphenamine<br>{[4-(5,7-dihydroxy-4-oxo-3,4-d<br>ihydro-2H-1-benzopyran-2-yl)-<br>5-hydroxy-13,13-dimethyl-8-o<br>xatetracyclo[7.4.1.0(2),0(1)(2),<br>(1)]tetradeca-2(7),3,5-trien-9-yl<br>]methoxy}sulfonic acid | Benzenoids                       | Benzene and substituted<br>derivatives    | 1.61 | 0.00 | 0.46 | -1.11 | down |
| 193 | 2-Isopropoxyphenyl                                                                                                                                                                                                     | --                               | --                                        | 1.22 | 0.03 | 0.04 | -4.66 | down |
| 194 | N-methylcarbamate                                                                                                                                                                                                      | Benzenoids                       | Phenol ethers                             | 1.63 | 0.00 | 0.31 | -1.71 | down |
| 195 | Hydroferulic acid                                                                                                                                                                                                      | Phenylpropanoids and polyketides | Phenylpropanoic acids                     | 1.62 | 0.00 | 0.42 | -1.25 | down |
| 196 | Ala Tyr Asp                                                                                                                                                                                                            | --                               | --                                        | 1.63 | 0.00 | 0.46 | -1.12 | down |
| 197 | His Ile Ser                                                                                                                                                                                                            | --                               | --                                        | 1.51 | 0.00 | 0.32 | -1.66 | down |
| 198 | Cevadine                                                                                                                                                                                                               | Lipids and lipid-like molecules  | Steroids and steroid derivatives          | 1.73 | 0.00 | 0.49 | -1.04 | down |
| 199 | Val Leu Lys Asp Ser                                                                                                                                                                                                    | --                               | --                                        | 1.66 | 0.00 | 0.42 | -1.26 | down |



|                            |                                                                                                                                     |                                  |                                  |      |      |      |       |      |
|----------------------------|-------------------------------------------------------------------------------------------------------------------------------------|----------------------------------|----------------------------------|------|------|------|-------|------|
|                            |                                                                                                                                     |                                  | Benzene and substituted          |      |      |      |       |      |
| 216                        | Tolterodine                                                                                                                         | Benzenoids                       | derivatives                      | 1.71 | 0.00 | 0.49 | -1.04 | down |
| 217                        | NBD-FTY720 phenoxy                                                                                                                  | --                               | --                               | 1.69 | 0.00 | 0.27 | -1.89 | down |
| 218                        | Methyl diacetox-8-gingerdiol                                                                                                        | --                               | --                               | 1.28 | 0.01 | 0.32 | -1.65 | down |
| 219                        | Tyr Val Met                                                                                                                         | --                               | --                               | 1.68 | 0.00 | 0.44 | -1.19 | down |
| 220                        | Azocyclotin                                                                                                                         | --                               | --                               | 1.65 | 0.00 | 0.43 | -1.23 | down |
| 221                        | Tolmetin                                                                                                                            | Organic oxygen compounds         | Organooxygen compounds           | 1.65 | 0.00 | 0.30 | -1.75 | down |
| 222                        | isofraxidin                                                                                                                         | --                               | --                               | 1.33 | 0.01 | 0.42 | -1.27 | down |
|                            |                                                                                                                                     |                                  | Benzene and substituted          |      |      |      |       |      |
| 223                        | Letrozole                                                                                                                           | Benzenoids                       | derivatives                      | 1.39 | 0.02 | 0.32 | -1.66 | down |
| 224                        | Palustrine                                                                                                                          | Phenylpropanoids and polyketides | Macrolactams                     | 1.74 | 0.00 | 0.36 | -1.48 | down |
| 225                        | Met Lys Asn His Leu                                                                                                                 | --                               | --                               | 1.45 | 0.00 | 0.50 | -1.00 | down |
| 226                        | Methylprednisolone succinate                                                                                                        | Lipids and lipid-like molecules  | Steroids and steroid derivatives | 1.74 | 0.00 | 0.28 | -1.84 | down |
|                            | 2-Pyridinecarboxamide,<br>4-[4-[[[4-chloro-3-(trifluoromethyl)phenyl]amino]carbonyl]amino]phenoxy]-N-methyl-<br>Medroxyprogesterone |                                  |                                  |      |      |      |       |      |
| 227                        |                                                                                                                                     | Organic oxygen compounds         | Organooxygen compounds           | 1.34 | 0.01 | 0.46 | -1.12 | down |
| 228                        | 17-acetate                                                                                                                          | Lipids and lipid-like molecules  | Steroids and steroid derivatives | 1.74 | 0.00 | 0.42 | -1.25 | down |
| 229                        | Val-Ser                                                                                                                             | --                               | --                               | 1.66 | 0.00 | 0.46 | -1.13 | down |
| <b>Negative ion (ESI-)</b> |                                                                                                                                     |                                  |                                  |      |      |      |       |      |
|                            |                                                                                                                                     | Hormones and hormone related     | Hormones and hormone related     |      |      |      |       |      |
| 1                          | cholic acid                                                                                                                         | compunds                         | compunds                         | 1.39 | 0.01 | 0.11 | -3.14 | down |
| 2                          | 2,3-Dihydroxybenzoic acid                                                                                                           | Organic acids                    | Organic acids                    | 1.62 | 0.00 | 0.45 | -1.15 | down |
| 3                          | Shikimic Acid                                                                                                                       | Organic acid And Its derivatives | Organicacid and Its derivatives  | 1.32 | 0.02 | 0.49 | -1.02 | down |
| 4                          | Methylmalonic Acid                                                                                                                  | Organic acid And Its derivatives | Organicacid and Its derivatives  | 1.64 | 0.00 | 0.36 | -1.46 | down |

|    |                                                                                                 |                                  |                                                                            |      |      |      |       |      |
|----|-------------------------------------------------------------------------------------------------|----------------------------------|----------------------------------------------------------------------------|------|------|------|-------|------|
| 5  | 3-(Methylthio)propionic acid                                                                    | Organic acid And Its derivatives | Organicacid and Its derivatives                                            | 1.64 | 0.00 | 0.48 | -1.06 | down |
| 6  | Pregnenolone sulfate                                                                            | Lipids and lipid-like molecules  | Steroids and steroid derivatives                                           | 1.60 | 0.00 | 0.48 | -1.05 | down |
| 7  | 1-Oleoyl-sn-glycero-3-phosphocholine                                                            | -                                | -                                                                          | 1.69 | 0.00 | 0.19 | -2.37 | down |
| 8  | alpha-Muricholic acid                                                                           | Bile acids                       | Bile acids                                                                 | 1.33 | 0.02 | 0.09 | -3.46 | down |
| 9  | Dattelic acid                                                                                   | Phenylpropanoids and polyketides | Cinnamic acids and derivatives                                             | 1.68 | 0.00 | 0.41 | -1.28 | down |
| 10 | Artomunoxanthentrione                                                                           | Organoheterocyclic compounds     | Benzopyrans                                                                | 1.71 | 0.00 | 0.40 | -1.32 | down |
| 11 | Nilutamide                                                                                      | Organoheterocyclic compounds     | Azolidines                                                                 | 1.64 | 0.00 | 0.47 | -1.10 | down |
| 12 | Myricetin                                                                                       | Flavonoids                       | Flavonols                                                                  | 1.65 | 0.00 | 0.45 | -1.16 | down |
| 13 | 1-Aminocyclohexanoic acid                                                                       | Organic acid And Its derivatives | Organicacid and Its derivatives                                            | 1.68 | 0.00 | 0.48 | -1.06 | down |
| 14 | Raltitrexed                                                                                     | Organic acids and derivatives    | Carboxylic acids and derivatives                                           | 1.72 | 0.00 | 0.36 | -1.46 | down |
| 15 | Pantetheine<br>4'-phosphate;4'-Phosphopantetheine;Phosphopantetheine;D-Pantetheine 4'-phosphate | Organic acids and derivatives    | Carboxylic acids and derivatives<br>Organic sulfonic acids and derivatives | 1.17 | 0.04 | 0.25 | -2.03 | down |
| 16 | Sulfoacetic acid                                                                                | Organic acids and derivatives    | derivatives                                                                | 1.61 | 0.00 | 0.36 | -1.48 | down |
| 17 | Thr Arg Lys Glu                                                                                 | --                               | --                                                                         | 1.68 | 0.00 | 0.43 | -1.21 | down |
| 18 | His Gln Val Lys                                                                                 | --                               | --                                                                         | 1.34 | 0.01 | 0.36 | -1.49 | down |
| 19 | 11-deoxy-PGF1                                                                                   | Lipids and lipid-like molecules  | Fatty Acyls                                                                | 1.68 | 0.00 | 0.47 | -1.10 | down |
| 20 | Adenosine 2'-Phosphate<br>6-(2,4-dihydroxyphenoxy)-3,4,5-trihydroxyoxane-2-carboxylic acid      | Nucleotide And Its metabolomics  | Nucleotide and Its metabolomics                                            | 1.39 | 0.01 | 0.39 | -1.36 | down |
| 21 | c acid                                                                                          | Organic oxygen compounds         | Organooxygen compounds                                                     | 1.65 | 0.00 | 0.44 | -1.17 | down |
| 22 | Isobavachalcone                                                                                 | Phenylpropanoids and polyketides | Linear 1,3-diarylpropanoids                                                | 1.66 | 0.00 | 0.44 | -1.19 | down |
| 23 | Psoralen                                                                                        | Lignans and Coumarins            | Coumarins                                                                  | 1.71 | 0.00 | 0.42 | -1.26 | down |

|    |                                                                                  |                                  |                                        |      |      |      |       |      |
|----|----------------------------------------------------------------------------------|----------------------------------|----------------------------------------|------|------|------|-------|------|
|    | Sodium methallylsulfonate:Sodium                                                 |                                  | Organic sulfonic acids and derivatives |      |      |      |       |      |
| 24 | methallyl sulfonate                                                              | Organic acids and derivatives    | derivatives                            | 1.57 | 0.00 | 0.49 | -1.02 | down |
| 25 | L-Pipecolic acid                                                                 | --                               | --                                     | 1.72 | 0.00 | 0.39 | -1.34 | down |
| 26 | 4-Methylbenzamide oxime                                                          | --                               | --                                     | 1.63 | 0.00 | 0.44 | -1.20 | down |
| 27 | 3,3'-Bisjuglone                                                                  | Benzenoids                       | Naphthalenes                           | 1.74 | 0.00 | 0.40 | -1.31 | down |
| 28 | Estradiol-17 3-sulfate                                                           | --                               | --                                     | 1.69 | 0.00 | 0.40 | -1.33 | down |
| 29 | 5-Fluorouracil                                                                   | Organoheterocyclic compounds     | Diazines                               | 1.66 | 0.00 | 0.46 | -1.11 | down |
|    | 5-Amino-2-p-toluidinobenzene sulfonic acid                                       | Benzenoids                       | Benzene and substituted derivatives    |      |      |      |       |      |
| 30 | sulfonic acid                                                                    | Benzenoids                       | derivatives                            | 1.49 | 0.00 | 0.41 | -1.29 | down |
| 31 | Decarboxy-Norlobaric Acid                                                        | Phenylpropanoids and polyketides | Depsidones and depsidones              | 1.71 | 0.00 | 0.41 | -1.29 | down |
|    | N-γ-Acetyl-N-2-Formyl-5-Met                                                      |                                  |                                        |      |      |      |       |      |
| 32 | hoxykynurenamine                                                                 | Amino acid and Its metabolomics  | Amino acid derivatives                 | 1.65 | 0.00 | 0.46 | -1.11 | down |
|    |                                                                                  |                                  | Benzene and substituted derivatives    |      |      |      |       |      |
| 33 | Chlorobenzene                                                                    | Benzenoids                       | derivatives                            | 1.70 | 0.00 | 0.44 | -1.19 | down |
|    |                                                                                  |                                  | Benzene and substituted derivatives    |      |      |      |       |      |
| 34 | Boscalid                                                                         | Benzenoids                       | derivatives                            | 1.61 | 0.00 | 0.35 | -1.49 | down |
| 35 | Trietazine                                                                       | Organoheterocyclic compounds     | Triazines                              | 1.19 | 0.02 | 0.39 | -1.36 | down |
| 36 | Oleoylglycerone phosphate                                                        | Organic oxygen compounds         | Organooxygen compounds                 | 1.53 | 0.00 | 0.40 | -1.34 | down |
|    | (1S)-1,5-Anhydro-1-(1,3,6-trihydroxy-5-methoxy-9-oxo-9H-xanthen-2-yl)-D-glucitol | Organoheterocyclic compounds     | Benzopyrans                            | 1.66 | 0.00 | 0.40 | -1.32 | down |
| 37 | anthen-2-yl)-D-glucitol                                                          | Organoheterocyclic compounds     | Benzopyrans                            | 1.66 | 0.00 | 0.40 | -1.32 | down |
| 38 | Prunasin                                                                         | Alkaloids                        | Alkaloids                              | 1.74 | 0.00 | 0.40 | -1.33 | down |
|    | Pyrimidine-4-Carboxylic Acid(sodium salt)                                        | Organoheterocyclic compounds     | Diazines                               | 1.64 | 0.00 | 0.48 | -1.05 | down |
| 39 | Acid(sodium salt)                                                                | Organoheterocyclic compounds     | Diazines                               | 1.64 | 0.00 | 0.48 | -1.05 | down |
| 40 | Picloram                                                                         | Organoheterocyclic compounds     | Pyridines and derivatives              | 1.05 | 0.03 | 0.46 | -1.12 | down |

|    |                              |                                           |                    |      |      |      |       |      |
|----|------------------------------|-------------------------------------------|--------------------|------|------|------|-------|------|
| 41 | 2-Arachidonyl Glycerol ether | Lipids and lipid-like molecules           | Endocannabinoids   | 1.71 | 0.00 | 0.36 | -1.47 | down |
| 42 | Lolitre K                    | Organoheterocyclic compounds              | Naphthopyrans      | 1.22 | 0.02 | 0.46 | -1.13 | down |
| 43 | Ziprasidone                  | Organoheterocyclic compounds              | Diazinanes         | 1.71 | 0.00 | 0.44 | -1.17 | down |
| 44 | Aspartyl adenylate           | Nucleosides, nucleotides, and analogues   | Purine nucleotides | 1.61 | 0.00 | 0.30 | -1.73 | down |
| 45 | 5'-Methoxyhydnoctocarpin-D   | Lignans, neolignans and related compounds | Flavonolignans     | 1.67 | 0.00 | 0.44 | -1.20 | down |

Supplemental Table 4. Upregulated differential metabolites between the *Pneumocystis*-infected WT mice and BAFF-R<sup>-/-</sup> *Pneumocystis*-infected mice under ESI- and ESI+ modes.

| No.                        | Compounds                                              | Class.I                         | Class.II                         | VIP  | p_value | Fold_Change | Log2FC | Type |
|----------------------------|--------------------------------------------------------|---------------------------------|----------------------------------|------|---------|-------------|--------|------|
| <b>Positive ion (ESI+)</b> |                                                        |                                 |                                  |      |         |             |        |      |
| 1                          | MG(0:0/18:1(9Z)/0:0)                                   | Lipids and lipid-like molecules | Glycerolipids                    | 1.89 | 0.01    | 2.68        | 1.42   | up   |
| 2                          | 15-Dehydro-prostaglandin D2                            | Lipids and lipid-like molecules | Fatty Acyls                      | 1.63 | 0.02    | 2.51        | 1.33   | up   |
| 3                          | Caffeine                                               | Alkaloids                       | Alkaloids                        | 1.66 | 0.03    | 2.54        | 1.34   | up   |
| 4                          | 2-Ethyl-4-hydroxy-5-methyl-3(2H)-furanone              | Organoheterocyclic compounds    | Dihydrofurans                    | 1.38 | 0.04    | 2.56        | 1.36   | up   |
| 5                          | L-Kynurenine                                           | --                              | --                               | 1.82 | 0.01    | 2.34        | 1.23   | up   |
| 6                          | (2S)-4-(2-aminophenyl)-2-azaniumyl-4-oxobutanoate      | Organic oxygen compounds        | Organooxygen compounds           | 1.85 | 0.01    | 3.12        | 1.64   | up   |
| 7                          | Norspermine;N,N'-Bis(3-aminopropyl)-1,3-propanediamine | Organic nitrogen compounds      | Organonitrogen compounds         | 1.43 | 0.04    | 2.32        | 1.21   | up   |
| 8                          | 7-Deoxyloganetate                                      | Lipids and lipid-like molecules | Prenol lipids                    | 1.82 | 0.01    | 2.61        | 1.39   | up   |
| 9                          | Pro Arg Trp                                            | --                              | --                               | 1.66 | 0.03    | 2.23        | 1.16   | up   |
| 10                         | Oxaloglutarate                                         | Organic acids and derivatives   | Carboxylic acids and derivatives | 1.81 | 0.02    | 2.22        | 1.15   | up   |
| 11                         | DL-2-Aminocaprylic acid                                | --                              | --                               | 2.24 | 0.00    | 2.34        | 1.22   | up   |

|    |                                                                 |                                 |                                        |      |      |      |      |    |
|----|-----------------------------------------------------------------|---------------------------------|----------------------------------------|------|------|------|------|----|
| 12 | Neamine;Neomycin A<br>3-Methylsalicylaldehyde;2-Hyd             | Organic oxygen compounds        | Organooxygen compounds                 | 1.74 | 0.02 | 2.79 | 1.48 | up |
| 13 | roxy-3-methylbenzaldehyde                                       | Organic oxygen compounds        | Organooxygen compounds                 | 1.61 | 0.02 | 2.06 | 1.04 | up |
| 14 | Phe Asn Thr Lys                                                 | --                              | --                                     | 1.62 | 0.04 | 2.22 | 1.15 | up |
| 15 | 1,24-Dihydroxyvitamin D3                                        | Lipids and lipid-like molecules | Steroids and steroid derivatives       | 2.06 | 0.01 | 7.52 | 2.91 | up |
| 16 | Normeperidine                                                   | Organoheterocyclic compounds    | Piperidines                            | 1.64 | 0.02 | 7.19 | 2.85 | up |
| 17 | N-Acetyl-5-Hydroxytryptamine                                    | Tryptamines,Cholines,Pigments   | Tryptamines                            | 1.71 | 0.03 | 2.40 | 1.26 | up |
| 18 | Dimethyl trisulfide                                             | Organosulfur compounds          | Organic trisulfides                    | 1.55 | 0.05 | 3.30 | 1.72 | up |
| 19 | Flufenacet                                                      | Benzenoids                      | Benzene and substituted<br>derivatives | 1.55 | 0.03 | 2.62 | 1.39 | up |
| 20 | 2-Aminobenzimidazole<br>16,16-Dimethyl-6-ketoprostagl           | Organoheterocyclic compounds    | Benzimidazoles                         | 1.62 | 0.04 | 2.38 | 1.25 | up |
| 21 | andin E1                                                        | Lipids and lipid-like molecules | Fatty Acyls                            | 1.65 | 0.02 | 3.11 | 1.64 | up |
| 22 | Bispyribac                                                      | Organic oxygen compounds        | Organooxygen compounds                 | 1.45 | 0.05 | 2.52 | 1.34 | up |
| 23 | TyrMe-Asp-OH                                                    | --                              | --                                     | 1.61 | 0.02 | 2.34 | 1.22 | up |
| 24 | 2-Phenylbutyramide                                              | Benzenoids                      | Benzene and substituted<br>derivatives | 1.82 | 0.02 | 2.03 | 1.03 | up |
| 25 | Picoxystrobin                                                   | Benzenoids                      | derivatives                            | 1.46 | 0.04 | 2.62 | 1.39 | up |
| 26 | Nocodazole                                                      | Organoheterocyclic compounds    | Benzimidazoles                         | 1.75 | 0.02 | 2.79 | 1.48 | up |
| 27 | Treprostinil                                                    | Benzenoids                      | Benzene and substituted<br>derivatives | 1.90 | 0.00 | 2.05 | 1.04 | up |
| 28 | Ala Pro Met<br>1H-1,4-Diazepine,                                | --                              | --                                     | 1.59 | 0.04 | 2.52 | 1.34 | up |
| 29 | 4-(aminoacetyl)hexahydro-2-m<br>ethyl-1-[(4-methyl-5-isoquinoli | Organic acids and derivatives   | Carboxylic acids and derivatives       | 1.61 | 0.02 | 2.44 | 1.29 | up |



|    |                                                                                                                                    |                                           |                                     |      |      |      |      |    |
|----|------------------------------------------------------------------------------------------------------------------------------------|-------------------------------------------|-------------------------------------|------|------|------|------|----|
|    | nyl)sulfonyl]-, (2S)-                                                                                                              |                                           |                                     |      |      |      |      |    |
| 30 | Alloxydim                                                                                                                          | Organic oxygen compounds                  | Organooxygen compounds              | 1.63 | 0.04 | 2.09 | 1.07 | up |
| 31 | L-Homocystine                                                                                                                      | Amino acid and Its metabolomics           | Amino acids                         | 1.62 | 0.03 | 2.55 | 1.35 | up |
|    | (3S,7R)-11-methoxy-3,7-dimethyl-6,8,16,20-tetraoxapentacyclo[10.8.0.0.2,9.0.3,7.0.13,18]icosa-1,4,9,11,13(18)-pentaene-17,19-dione | Phenylpropanoids and polyketides          | Coumarins and derivatives           | 1.50 | 0.04 | 2.19 | 1.13 | up |
| 32 |                                                                                                                                    |                                           | Amino acid and Its metabolomics     |      |      |      |      |    |
| 33 | Ala-Glu                                                                                                                            | Amino acid and Its metabolomics           | metabolomics                        | 1.80 | 0.01 | 2.22 | 1.15 | up |
|    |                                                                                                                                    |                                           | Benzene and substituted derivatives |      |      |      |      |    |
| 34 | 2-Aminoethyl diphenylborinate                                                                                                      | Benzenoids                                | derivatives                         | 1.63 | 0.03 | 3.02 | 1.60 | up |
| 35 | Nitrazepam                                                                                                                         | Organoheterocyclic compounds              | Benzodiazepines                     | 1.45 | 0.04 | 2.69 | 1.43 | up |
|    |                                                                                                                                    | Lignans, neolignans and related compounds |                                     |      |      |      |      |    |
| 36 | (-)-Secoisolariciresinol                                                                                                           |                                           | Dibenzylbutane lignans              | 1.70 | 0.02 | 2.61 | 1.38 | up |
|    | 1-(2,4-Dichlorophenyl)-2-(1-imidazolyl)ethanol                                                                                     | Benzenoids                                | Benzene and substituted derivatives | 1.44 | 0.05 | 2.18 | 1.13 | up |
| 37 |                                                                                                                                    |                                           |                                     |      |      |      |      |    |
| 38 | Dibenz[a,h]acridine                                                                                                                | Organoheterocyclic compounds              | Quinolines and derivatives          | 1.77 | 0.02 | 2.14 | 1.10 | up |
| 39 | (+)-Isocorydine                                                                                                                    | Alkaloids and derivatives                 | Aporphines                          | 1.52 | 0.04 | 2.69 | 1.43 | up |
| 40 | His Ile Ser                                                                                                                        | --                                        | --                                  | 1.70 | 0.02 | 2.66 | 1.41 | up |
| 41 | 5'-Methoxybilobetin                                                                                                                | Phenylpropanoids and polyketides          | Flavonoids                          | 1.55 | 0.04 | 2.40 | 1.26 | up |
|    |                                                                                                                                    |                                           | Benzene and substituted derivatives |      |      |      |      |    |
| 42 | Sotalol                                                                                                                            | Benzenoids                                | derivatives                         | 1.52 | 0.02 | 2.30 | 1.20 | up |
|    |                                                                                                                                    |                                           | Benzene and substituted derivatives |      |      |      |      |    |
| 43 | Penfluridol                                                                                                                        | Benzenoids                                | derivatives                         | 1.50 | 0.04 | 2.47 | 1.30 | up |
| 44 | N-Butyryl-L-homocysteine                                                                                                           | Organic acids and derivatives             | Carboxylic acids and derivatives    | 1.87 | 0.02 | 2.32 | 1.22 | up |

thiolactone

**Negative ion (ESI-)**

| No. | Compounds                            | Class.I                                | Class.II                               | VIP  | p_value | Fold_Change | Log2FC | Type |
|-----|--------------------------------------|----------------------------------------|----------------------------------------|------|---------|-------------|--------|------|
| 1   | cholic acid                          | Hormones and hormone related compounds | Hormones and hormone related compounds | 1.23 | 0.04    | 2.12        | 1.08   | up   |
| 2   | 4-Chloro-2-methylphenol              | Benzenoids                             | Phenols                                | 1.59 | 0.02    | 2.39        | 1.26   | up   |
| 3   | 1-Oleoyl-sn-glycero-3-phosphocholine | -                                      | -                                      | 1.59 | 0.03    | 4.14        | 2.05   | up   |
| 4   | Adenosine 2'-Phosphate               | Nucleotide And Its metabolomics        | Nucleotide and Its metabolomics        | 1.60 | 0.02    | 2.14        | 1.10   | up   |
| 5   | 17 $\alpha$ -Ethinylestradiol        | Hormones and hormone related compounds | Hormones and hormone related compounds | 1.67 | 0.02    | 2.05        | 1.03   | up   |
| 6   | Ergothioneine                        | Organic acid And Its derivatives       | Organic acid and Its derivatives       | 1.48 | 0.02    | 2.22        | 1.15   | up   |
| 7   | Oleoylglycerone phosphate            | Organic oxygen compounds               | Organooxygen compounds                 | 1.80 | 0.02    | 2.33        | 1.22   | up   |

Supplemental Table 5. Downregulated differential metabolites between the *Pneumocystis*-infected WT mice and BAFF-R<sup>-/-</sup> *Pneumocystis*-infected mice under ESI- and ESI+ modes.

| No.                        | Compounds                                                       | Class.I                         | Class.II             | VIP  | p_value | Fold_Change | Log2FC | Type |
|----------------------------|-----------------------------------------------------------------|---------------------------------|----------------------|------|---------|-------------|--------|------|
| <b>Positive ion (ESI+)</b> |                                                                 |                                 |                      |      |         |             |        |      |
| 1                          | PA(15:0/22:2(13Z,16Z))<br>TG(16:0/14:1(9Z)/20:3(5Z,8Z,<br>11Z)) | Lipids and lipid-like molecules | Glycerophospholipids | 1.50 | 0.03    | 0.44        | -1.18  | down |
| 2                          | PE-NMe(14:0/20:1(11Z))                                          | Lipids and lipid-like molecules | Glycerolipids        | 2.01 | 0.01    | 0.34        | -1.54  | down |
| 3                          | PE-NMe(14:0/18:1(11Z))                                          | Lipids and lipid-like molecules | Glycerophospholipids | 1.45 | 0.04    | 0.45        | -1.14  | down |
| 4                          | PE-NMe(14:0/18:1(11Z))                                          | Lipids and lipid-like molecules | Glycerophospholipids | 2.05 | 0.00    | 0.44        | -1.19  | down |
| 5                          | PC(16:1(9Z)/18:1(11Z))                                          | Lipids and lipid-like molecules | Glycerophospholipids | 1.39 | 0.04    | 0.49        | -1.03  | down |
| 6                          | PE-NMe2(15:0/16:0)                                              | Lipids and lipid-like molecules | Glycerophospholipids | 1.98 | 0.00    | 0.34        | -1.55  | down |

|    |                                                                                                            |                                 |                                  |      |      |      |       |      |
|----|------------------------------------------------------------------------------------------------------------|---------------------------------|----------------------------------|------|------|------|-------|------|
| 7  | D-erythro-3-Methylmalate;(2R,3S)-3-Methylmalate                                                            | Lipids and lipid-like molecules | Fatty Acyls                      | 1.44 | 0.03 | 0.41 | -1.27 | down |
| 8  | Alitretinoin                                                                                               | Lipids and lipid-like molecules | Prenol lipids                    | 2.02 | 0.00 | 0.49 | -1.03 | down |
| 9  | PA(22:1(13Z)/19:2(10Z,13Z))                                                                                | Lipids and lipid-like molecules | Glycerophospholipids             | 2.10 | 0.00 | 0.44 | -1.20 | down |
| 10 | TG(20:0/18:4(6Z,9Z,12Z,15Z)/18:1(9Z))                                                                      | Lipids and lipid-like molecules | Glycerolipids                    | 1.76 | 0.05 | 0.46 | -1.13 | down |
| 11 | PC(20:5(5Z,8Z,11Z,14Z,17Z)/18:1(9Z))                                                                       | Lipids and lipid-like molecules | Glycerophospholipids             | 1.79 | 0.02 | 0.27 | -1.87 | down |
| 12 | PC(18:1(9Z)/22:2(13Z,16Z))                                                                                 | Lipids and lipid-like molecules | Glycerophospholipids             | 2.03 | 0.01 | 0.47 | -1.10 | down |
| 13 | Hexadecanoic Acid(C16:0)                                                                                   | Lipids and lipid-like molecules | Fatty Acyls                      | 1.62 | 0.01 | 0.46 | -1.11 | down |
| 14 | Isopropyl alcohol                                                                                          | Organic oxygen compounds        | Organooxygen compounds           | 1.69 | 0.01 | 0.47 | -1.10 | down |
| 15 | DG(20:4(5Z,8Z,11Z,14Z)/22:5(4Z,7Z,10Z,13Z,16Z)/0:0)                                                        | Lipids and lipid-like molecules | Glycerolipids                    | 1.52 | 0.01 | 0.34 | -1.55 | down |
| 16 | Taurodeoxycholate;Taurodeoxycholic acid<br>(±)5-HETE<br>[(±)5-hydroxy-6E,8Z,11Z,14Z-eicosatetraenoic acid] | Lipids and lipid-like molecules | Steroids and steroid derivatives | 2.15 | 0.00 | 0.44 | -1.18 | down |
| 17 | Aldehydo-D-galactose                                                                                       | Organic oxygen compounds        | Organooxygen compounds           | 2.26 | 0.00 | 0.45 | -1.15 | down |
| 18 | 3-Hydroxybutyrylcarnitine                                                                                  | Lipids and lipid-like molecules | Fatty Acyls                      | 1.66 | 0.02 | 0.50 | -1.00 | down |
| 19 | Carnitine C13:0                                                                                            | FA                              | CAR                              | 2.03 | 0.00 | 0.38 | -1.40 | down |
| 20 | D-PANTOTHENIC ACID                                                                                         | --                              | --                               | 1.35 | 0.04 | 0.41 | -1.28 | down |
| 21 | 5-Hydroxytryptophol                                                                                        | Alkaloids                       | Plumerane                        | 2.01 | 0.00 | 0.38 | -1.39 | down |
| 22 | PA(21:0/12:0)                                                                                              | Lipids and lipid-like molecules | Glycerophospholipids             | 2.16 | 0.00 | 0.46 | -1.11 | down |
| 23 | 2-Amino-4-hydroxy-6-hydroxymethyl-7,8-dihydropteridine                                                     | --                              | --                               | 1.50 | 0.03 | 0.40 | -1.32 | down |

|                            |                                                             |                                  |                                        |      |      |      |       |      |  |
|----------------------------|-------------------------------------------------------------|----------------------------------|----------------------------------------|------|------|------|-------|------|--|
| 25                         | Cytidine                                                    | Nucleotide And Its metabolomics  | Nucleotide and Its metabolomics        | 1.77 | 0.01 | 0.50 | -1.01 | down |  |
| 26                         | TG(14:0/18:1(11Z)/18:1(11Z))                                | Lipids and lipid-like molecules  | Glycerolipids                          | 2.12 | 0.01 | 0.37 | -1.45 | down |  |
| 27                         | Eicosapentaenoyl PAF C-16<br>11-nor-9-carboxy-Delta(9)-tetr | Lipids and lipid-like molecules  | Glycerophospholipids                   | 2.06 | 0.00 | 0.47 | -1.10 | down |  |
| 28                         | ahydrocannabinol                                            | Organoheterocyclic compounds     | Benzopyrans                            | 1.46 | 0.04 | 0.50 | -1.01 | down |  |
| 29                         | Pro Pro Ile                                                 | --                               | --                                     | 1.94 | 0.00 | 0.41 | -1.29 | down |  |
| 30                         | Jasmone                                                     | Others                           | Others                                 | 1.68 | 0.02 | 0.50 | -1.01 | down |  |
| 31                         | 22-Angeloyltheasapogenol A                                  | Lipids and lipid-like molecules  | Prenol lipids                          | 1.72 | 0.05 | 0.41 | -1.27 | down |  |
| 32                         | Isopropamide<br>5-Geranoxy-7-methoxycoumar                  | Benzenoids                       | Benzene and substituted<br>derivatives | 2.18 | 0.00 | 0.44 | -1.19 | down |  |
| 33                         | in                                                          | Lipids and lipid-like molecules  | Prenol lipids                          | 1.72 | 0.01 | 0.39 | -1.37 | down |  |
| 34                         | Farnesylthiosalicylic acid                                  | Lipids and lipid-like molecules  | Prenol lipids                          | 2.24 | 0.00 | 0.29 | -1.77 | down |  |
| 35                         | Minocycline<br>N-3-Oxododecanoyl-L-homose                   | Phenylpropanoids and polyketides | Tetracyclines                          | 1.92 | 0.01 | 0.47 | -1.08 | down |  |
| 36                         | rine lactone                                                | Organic acids and derivatives    | Carboxylic acids and derivatives       | 2.17 | 0.00 | 0.23 | -2.11 | down |  |
| 37                         | Lys Lys Gly                                                 | --                               | --                                     | 1.66 | 0.03 | 0.44 | -1.20 | down |  |
| 38                         | Lobaric acid                                                | Phenylpropanoids and polyketides | Depsidones and depsidones              | 2.32 | 0.00 | 0.24 | -2.08 | down |  |
| 39                         | Azelaic acid<br>(3beta,22R,23R,24S)-3,22,23-                | --                               | --                                     | 2.10 | 0.00 | 0.13 | -2.95 | down |  |
| 40                         | Trihydroxystigmastan-6-one                                  | Lipids and lipid-like molecules  | Steroids and steroid derivatives       | 1.82 | 0.01 | 0.43 | -1.23 | down |  |
| 41                         | 3-hexanoyl-NBD Cholesterol                                  | Lipids and lipid-like molecules  | Steroids and steroid derivatives       | 1.62 | 0.02 | 0.33 | -1.62 | down |  |
| <b>Negative ion (ESI-)</b> |                                                             |                                  |                                        |      |      |      |       |      |  |
|                            | cis-7,10,13,16,19-Docosapenta                               |                                  |                                        |      |      |      |       |      |  |
| 1                          | enoic acid                                                  | Lipids and lipid-like molecules  | Fatty Acyls                            | 1.97 | 0.01 | 0.42 | -1.24 | down |  |
| 2                          | Oleandolide                                                 | Phenylpropanoids and polyketides | Macrolides and analogues               | 1.51 | 0.02 | 0.50 | -1.01 | down |  |

|    |                                |                                     |                                  |      |      |      |       |      |
|----|--------------------------------|-------------------------------------|----------------------------------|------|------|------|-------|------|
| 3  | 4-hydroxybenzenesulfonic acid  | Organic acid And Its derivatives    | Sulfonic acids                   | 2.02 | 0.00 | 0.33 | -1.61 | down |
| 4  | FFA(20:3)                      | Lipids                              | Free fatty acids                 | 2.21 | 0.00 | 0.49 | -1.02 | down |
| 5  | 3-Sulfocatechol                | Benzene and substituted derivatives | Phenolics                        | 1.99 | 0.00 | 0.39 | -1.34 | down |
| 6  | Hexanoyl Glycine               | Amino acid and Its metabolomics     | Amino acid derivatives           | 2.25 | 0.00 | 0.20 | -2.33 | down |
| 7  | alpha-Bisabolol oxide C        | Organoheterocyclic compounds        | Oxanes                           | 2.11 | 0.00 | 0.14 | -2.84 | down |
| 8  | Hydrocortisone acetate         | Lipids and lipid-like molecules     | Steroids and steroid derivatives | 1.63 | 0.01 | 0.43 | -1.21 | down |
| 9  | Fast green FCF                 | --                                  | --                               | 1.44 | 0.02 | 0.39 | -1.34 | down |
| 10 | 2-Hydroxy-2-methylbutyric acid | Organic acids                       | Organic acids                    | 1.81 | 0.00 | 0.32 | -1.65 | down |
| 11 | Altanserin                     | Organic oxygen compounds            | Organooxygen compounds           | 2.05 | 0.00 | 0.40 | -1.34 | down |
| 12 | 4-Hydroxybenzoic Acid          | Phenolic acids                      | Phenolic acids                   | 2.04 | 0.00 | 0.34 | -1.56 | down |
| 13 | Phenol                         | Phenolic acids                      | Phenolic acids                   | 1.99 | 0.00 | 0.37 | -1.44 | down |
| 14 | Lys Thr Gln Lys                | --                                  | --                               | 2.17 | 0.00 | 0.33 | -1.60 | down |
| 15 | Phenethyl rutinoside           | Organic oxygen compounds            | Organooxygen compounds           | 2.10 | 0.00 | 0.39 | -1.36 | down |
| 16 | Sericetin                      | Phenylpropanoids and polyketides    | Flavonoids                       | 2.20 | 0.00 | 0.41 | -1.27 | down |

---

## Figure legends of the Supplemental Figures

Supplemental Figure 1. Heatmaps presented a different pattern of metabolites between the control group and *Pneumocystis*-infected WT mice in positive ion modes.

Supplemental Figure 2. Heatmaps presented a different pattern of metabolites between the control group and *Pneumocystis*-infected WT mice in negative ion modes.

Supplemental Figure 3. Heatmaps showed differential metabolic profiling of lung samples between *Pneumocystis*-infected WT mice and *Pneumocystis*-infected BAFF-R<sup>-/-</sup> mice in positive ion modes.

Supplemental Figure 4. Heatmaps showed differential metabolic profiling of lung samples between the *Pneumocystis*-infected WT mice and *Pneumocystis*-infected BAFF-R<sup>-/-</sup> mice in negative ion modes.

Supplemental Figure 5. Violin plot of the top 20 differential metabolites between the control group and *Pneumocystis*-infected WT mice.

Supplemental Figure 6. The pathway map of tryptophan metabolism in the comparison between the control group and *Pneumocystis*-infected WT mice.

Supplemental Figure 7. Violin plot of the top 20 differential metabolites between the *Pneumocystis*-infected WT mice and *Pneumocystis*-infected BAFF-R<sup>-/-</sup> mice.

Supplemental Figure 8. The pathway map of adipocytokine signaling pathway in the comparison between the *Pneumocystis*-infected WT mice and *Pneumocystis*-infected BAFF-R<sup>-/-</sup> mice.

Supplemental Figure 9. The pathway map of fatty acid elongation in the comparison between the *Pneumocystis*-infected WT mice and *Pneumocystis*-infected BAFF-R<sup>-/-</sup> mice.

Supplemental Figure 1

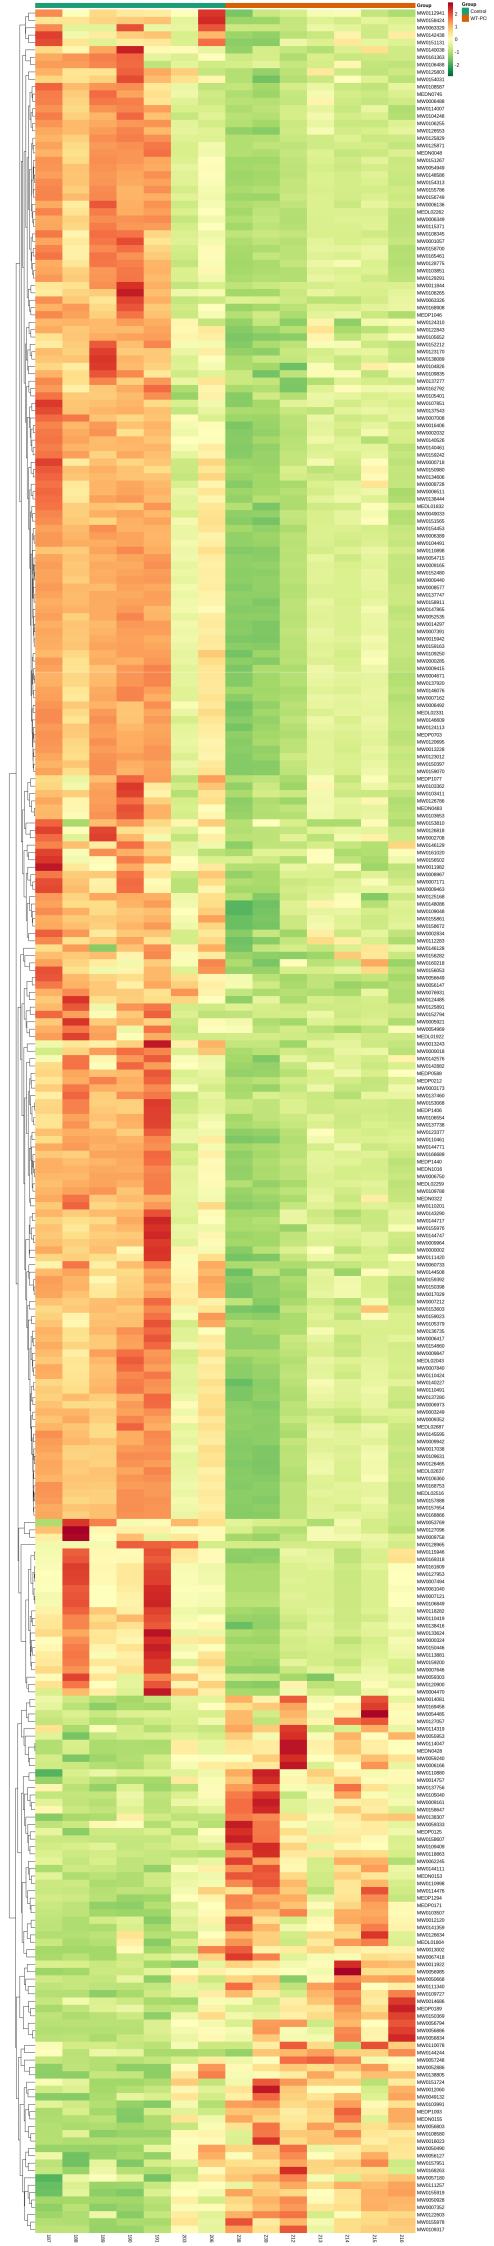

Supplemental Figure 2

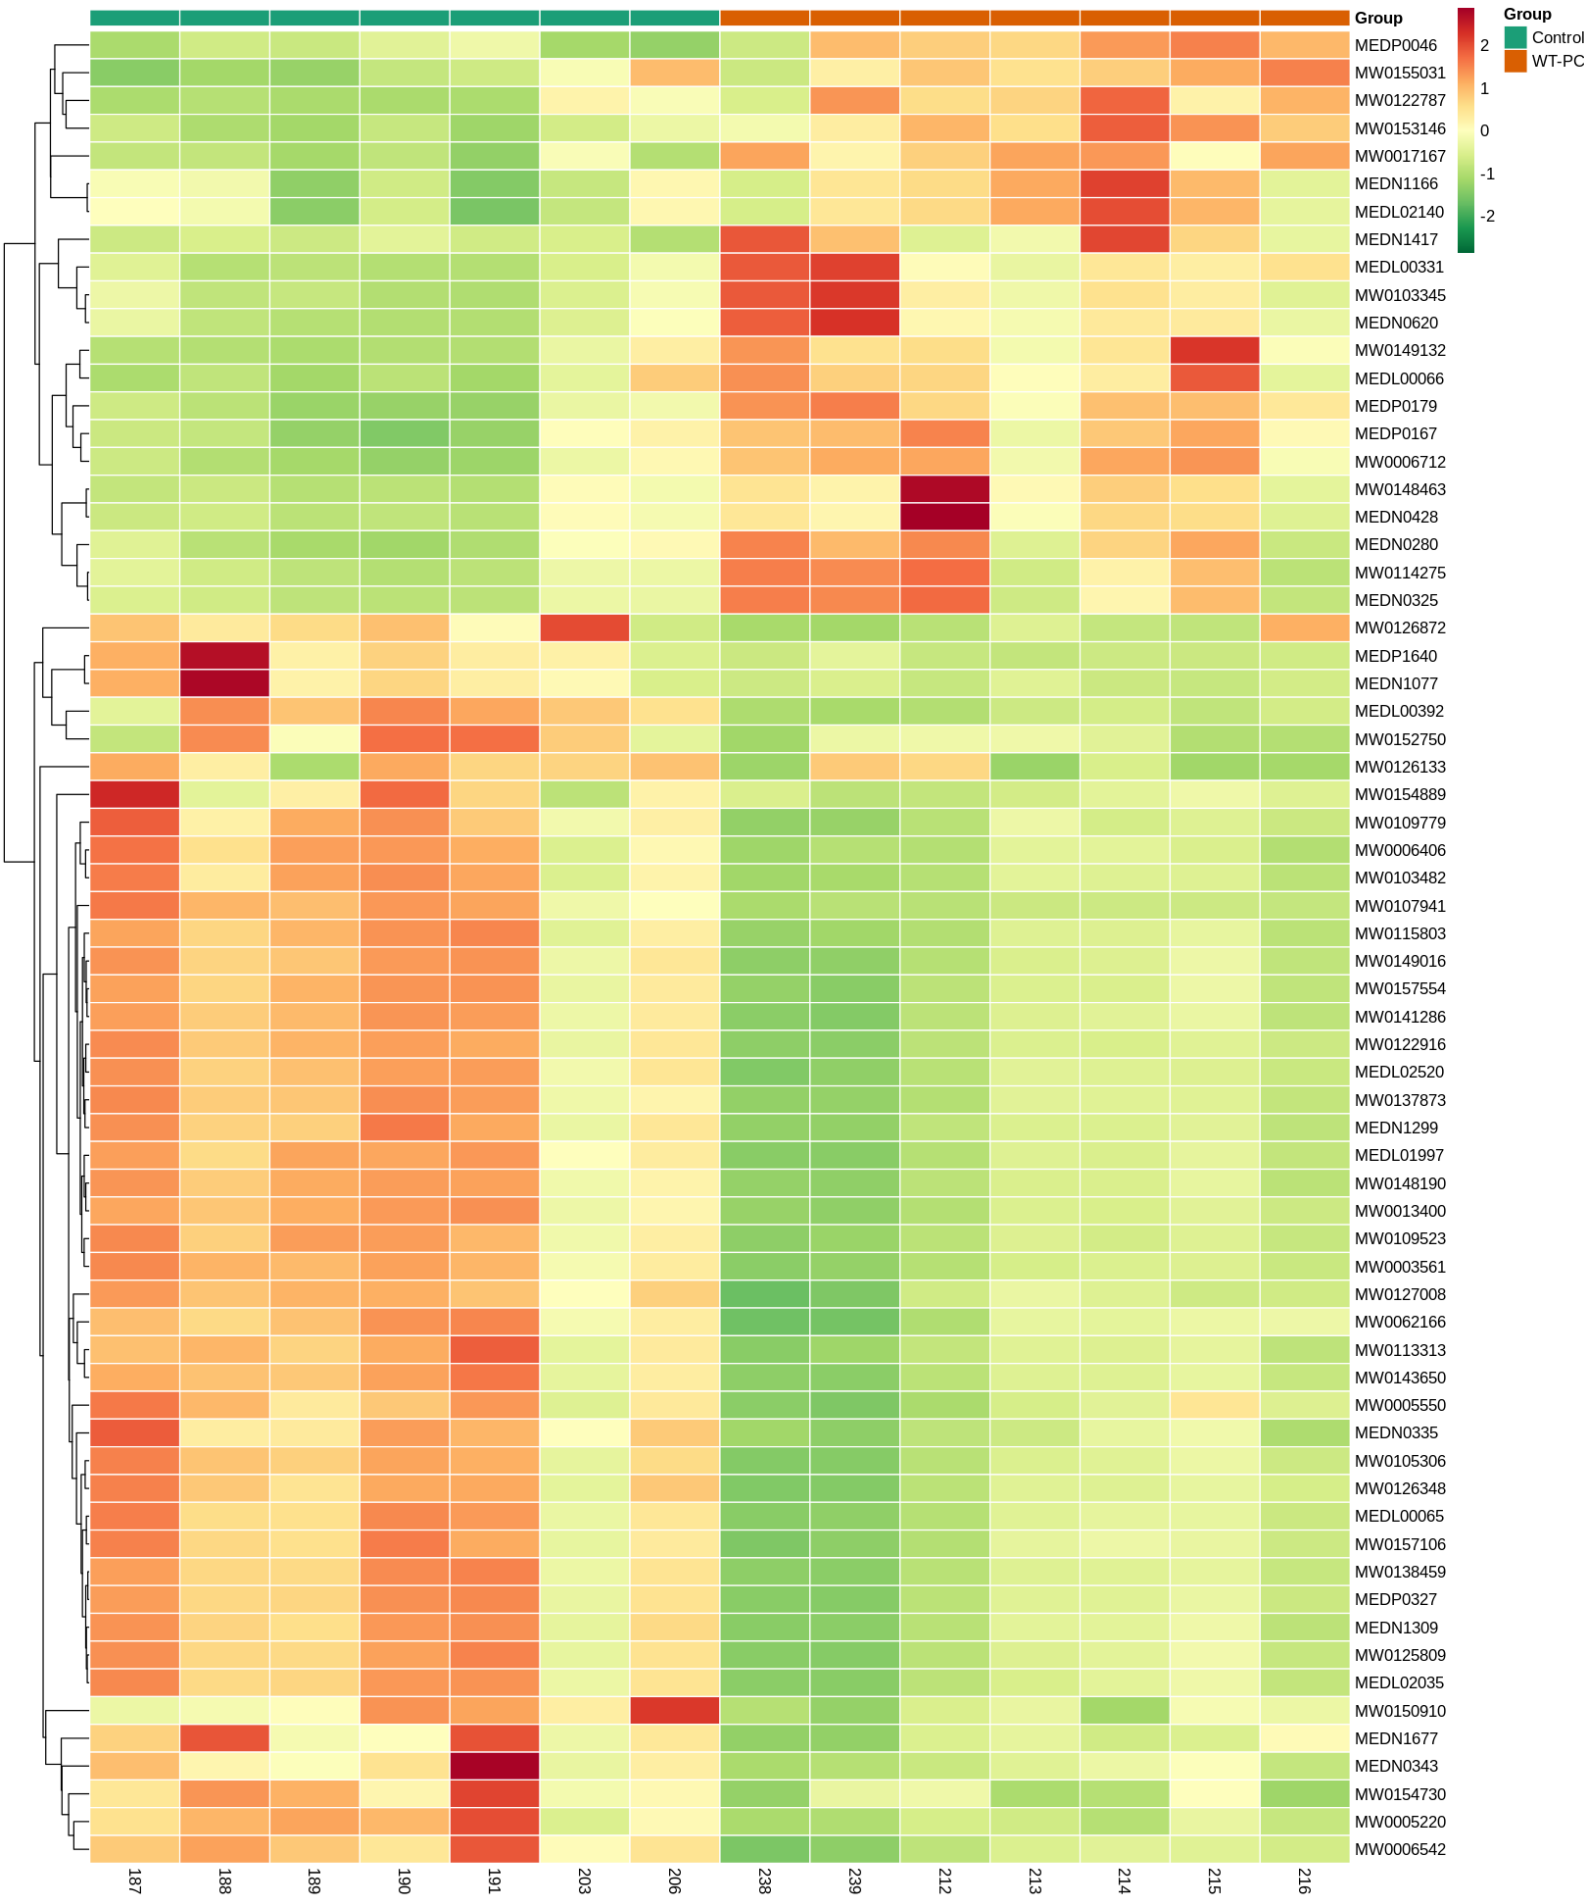



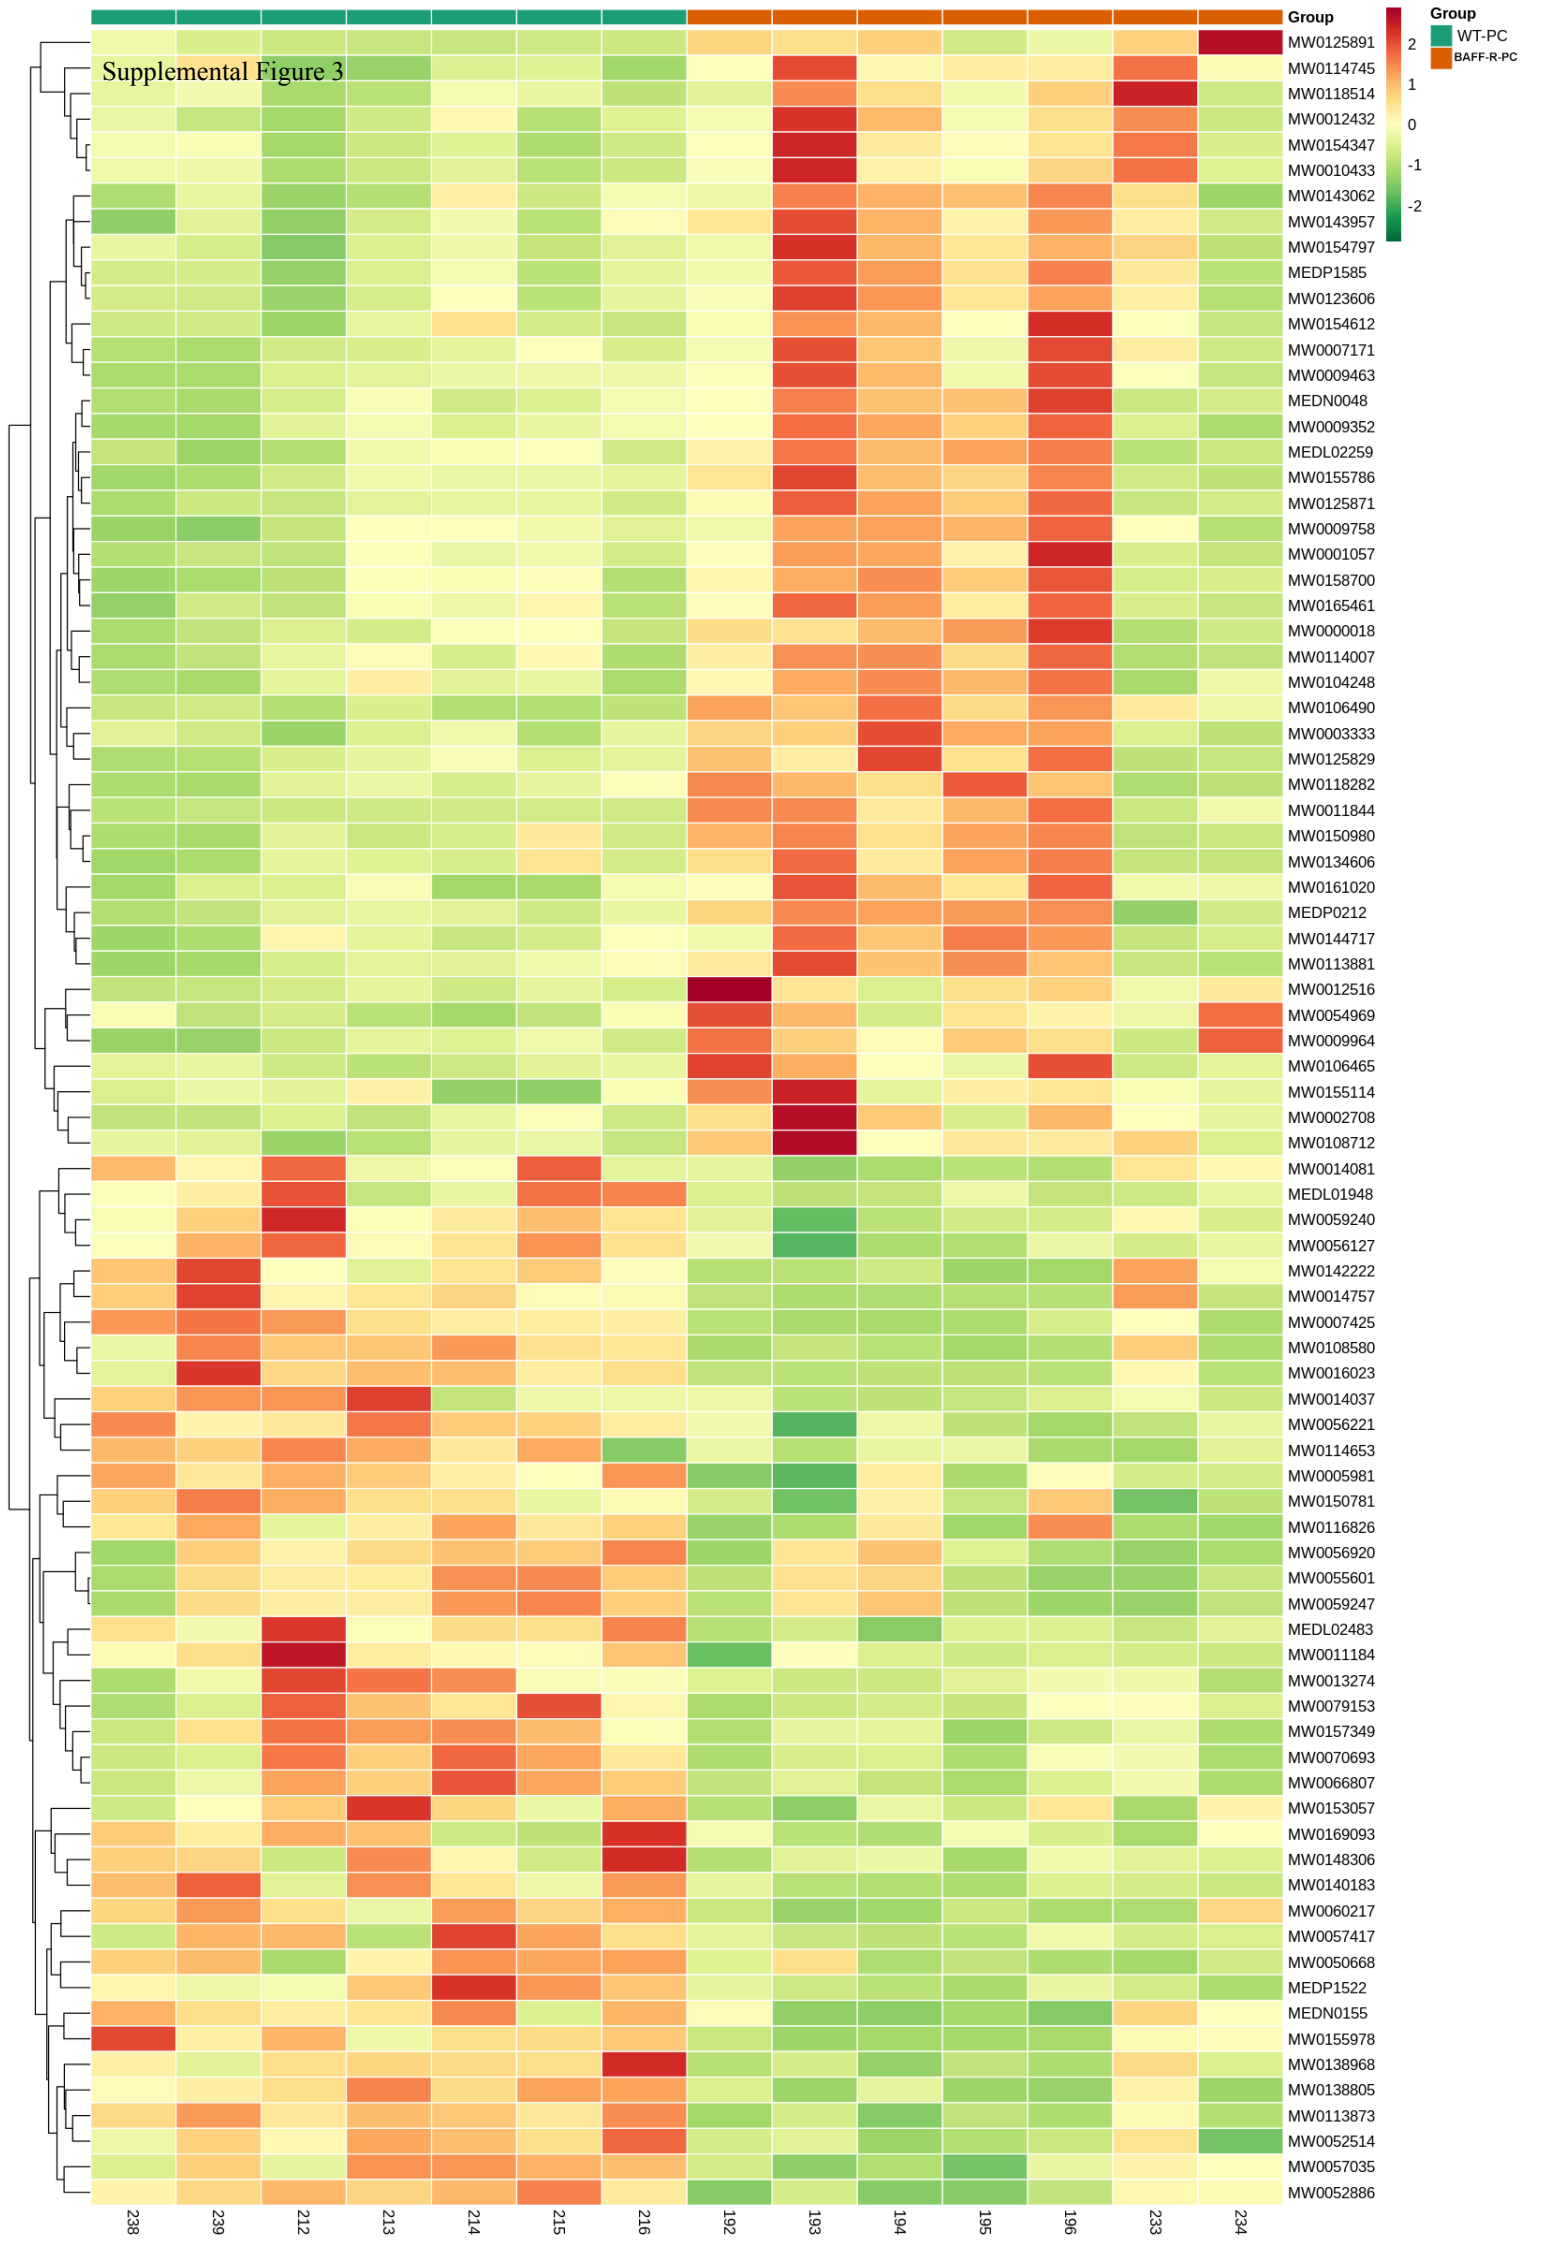



Supplemental Figure 5

Violin Plot of Raw Values

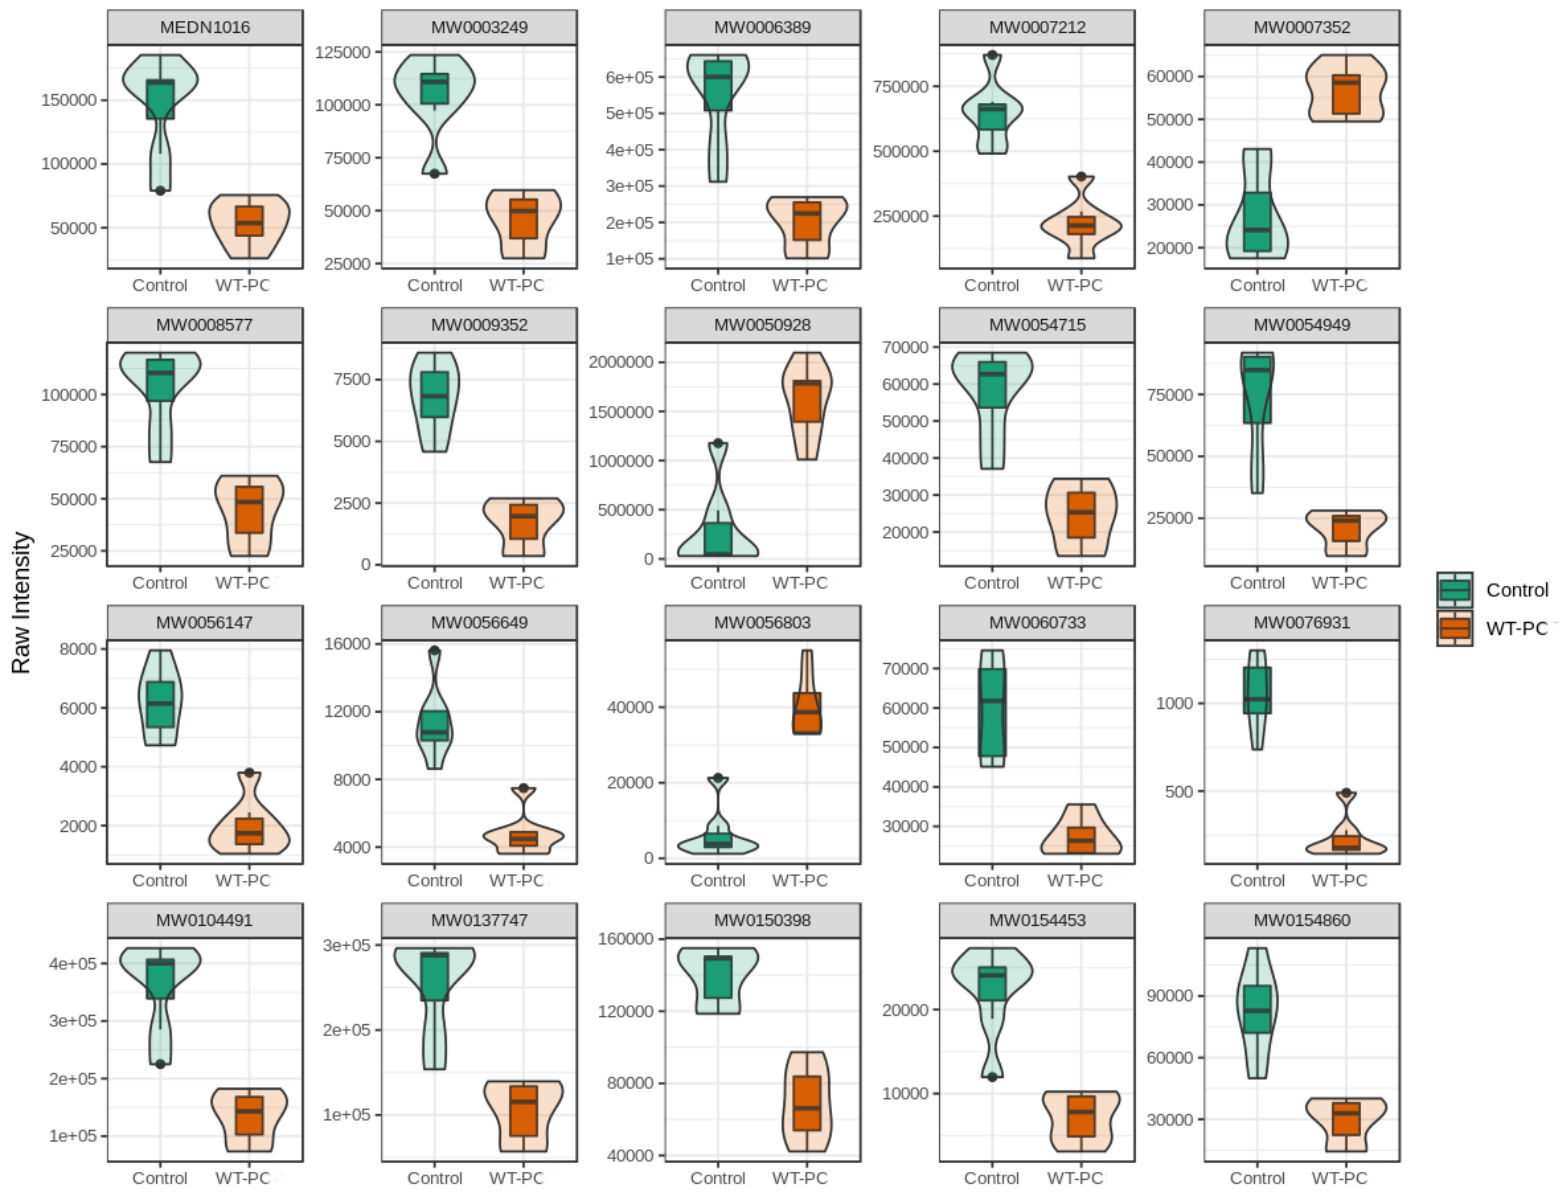

# Supplemental Figure 6

## TRYPTOPHAN METABOLISM

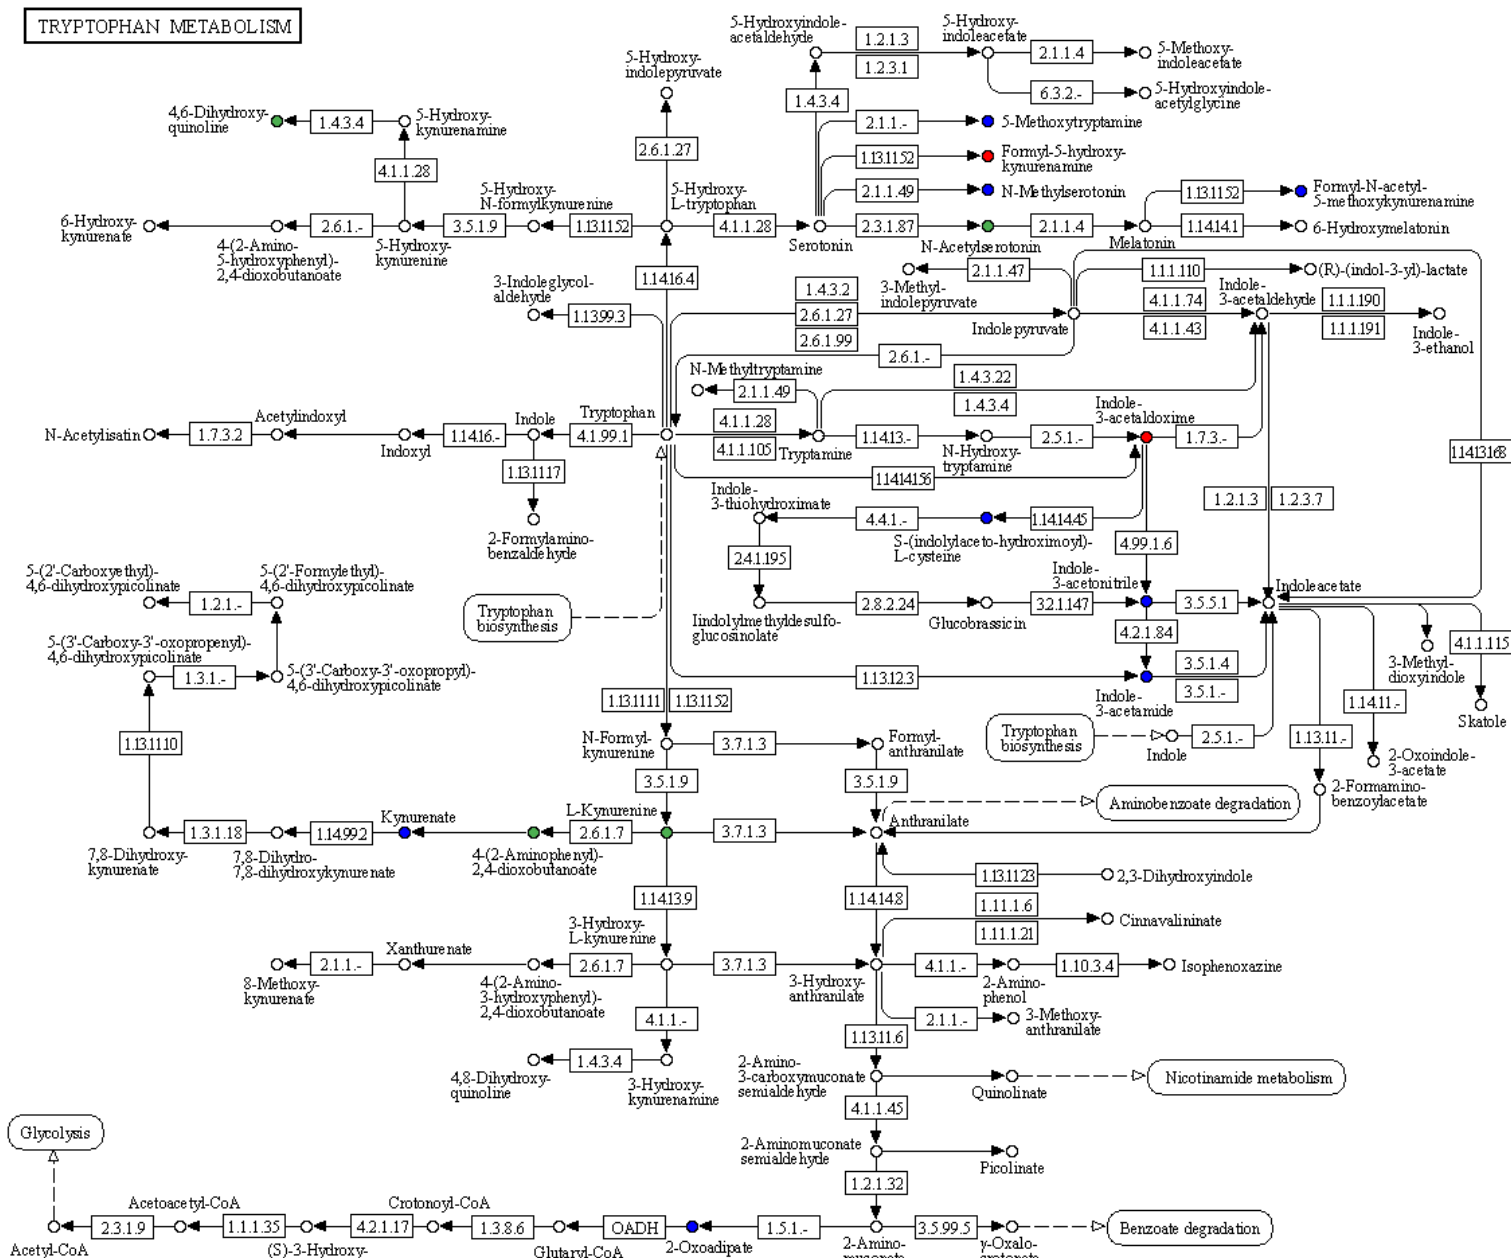

Supplemental Figure 7

Violin Plot of Raw Values

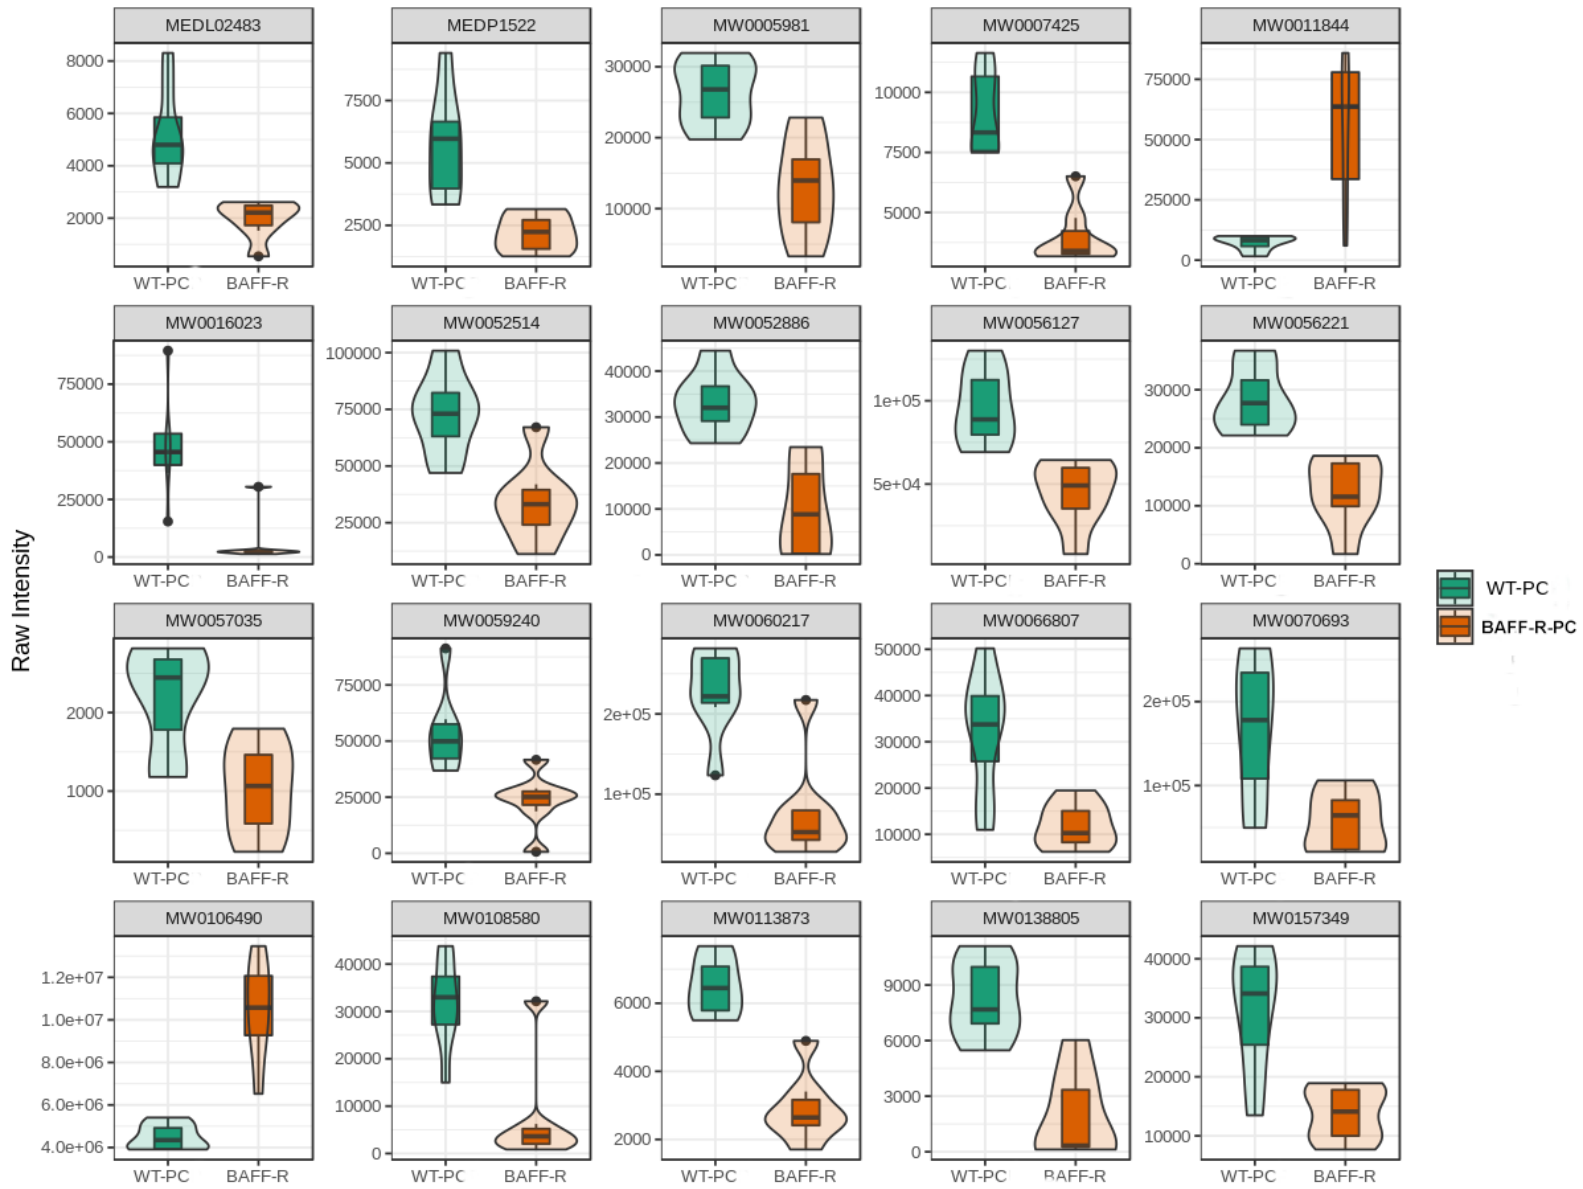

Supplemental Figure 8

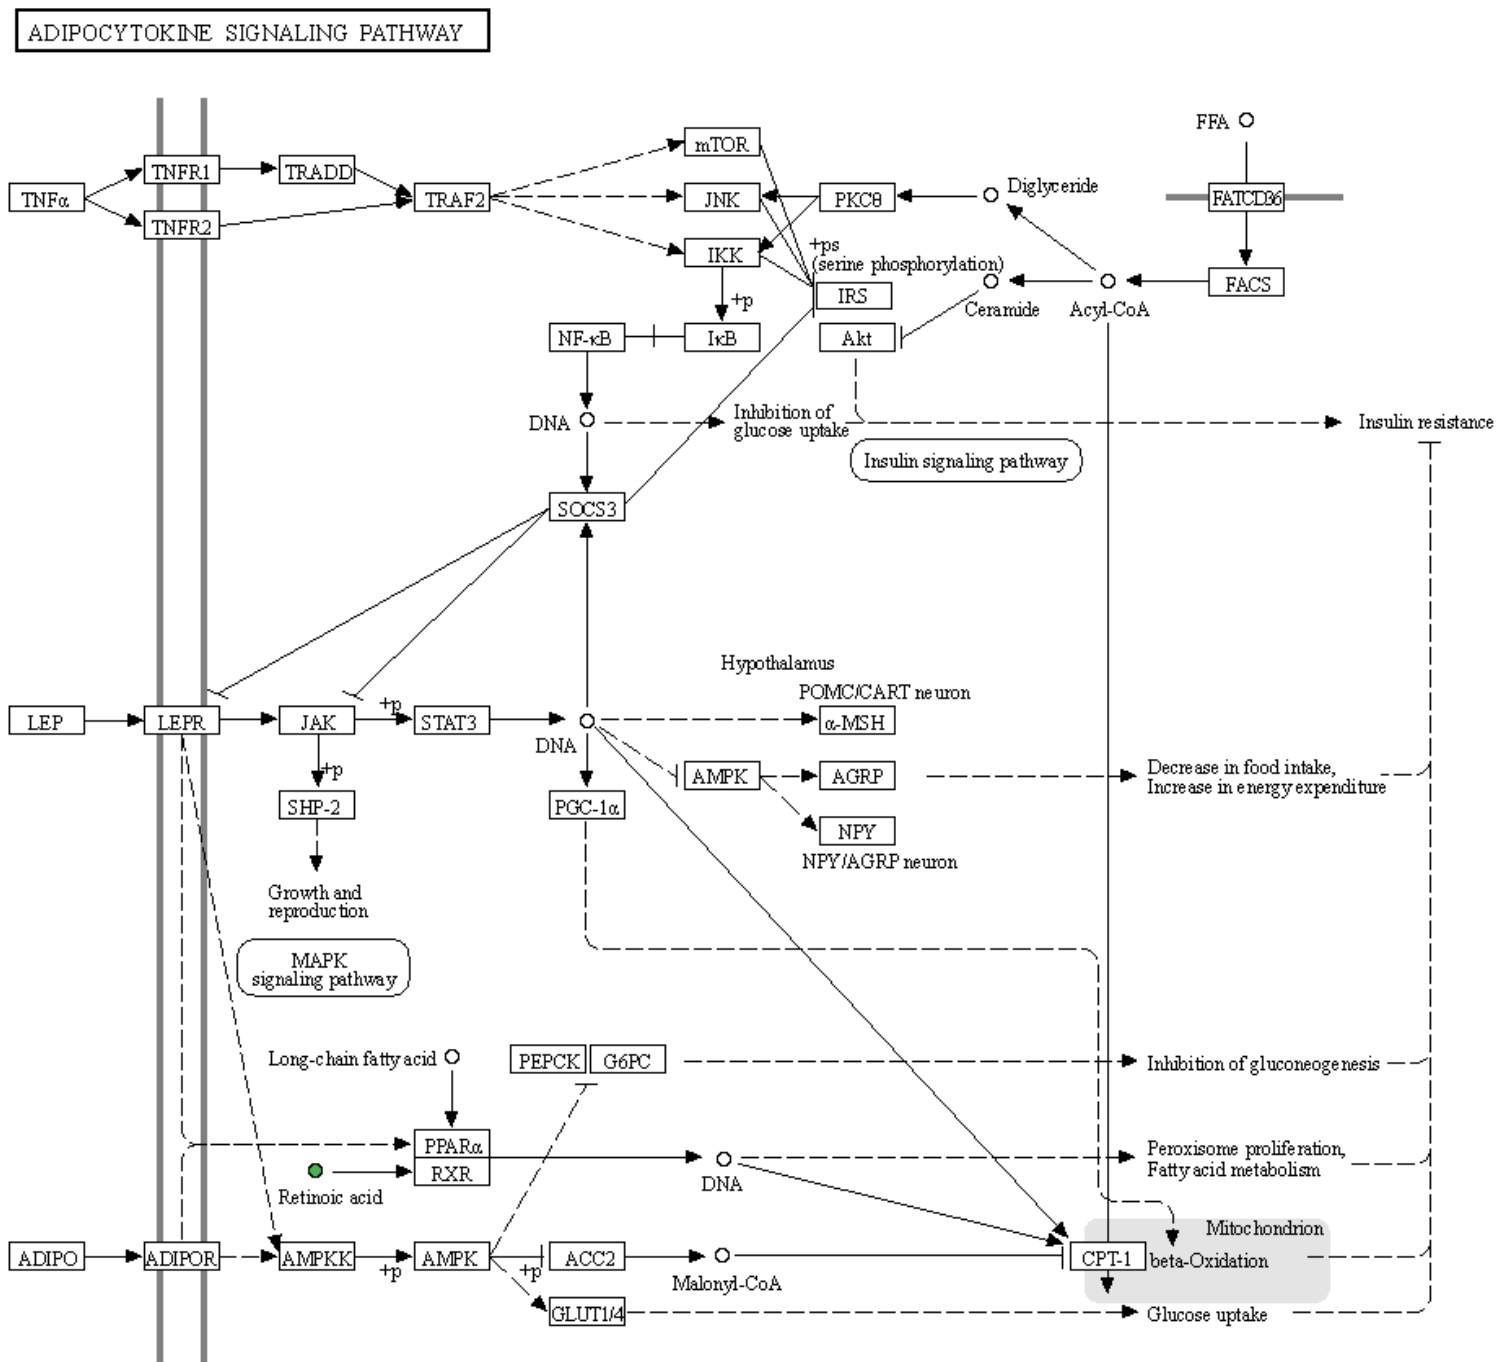

FATTY ACID ELONGATION

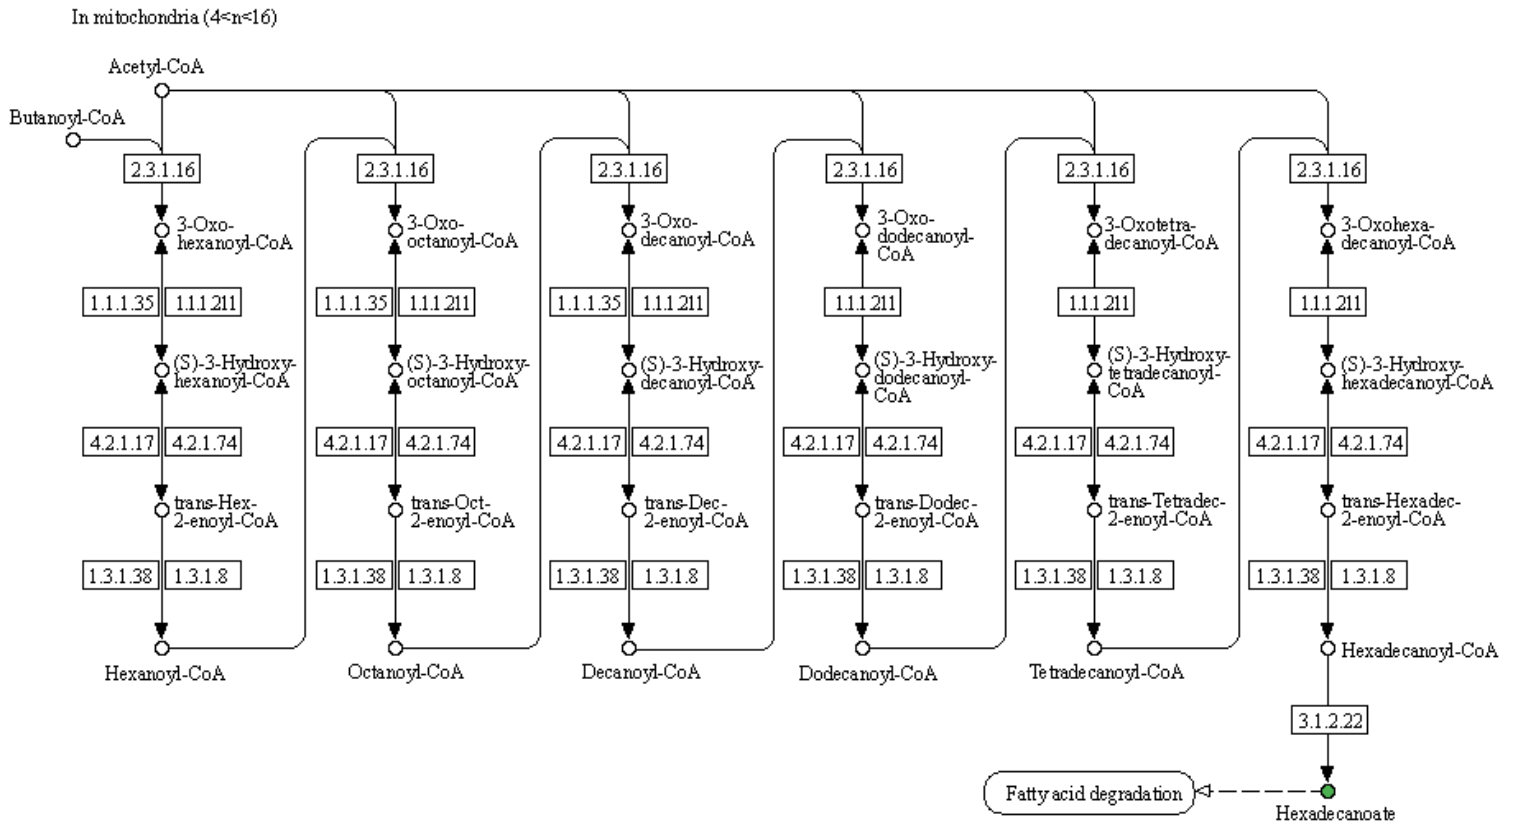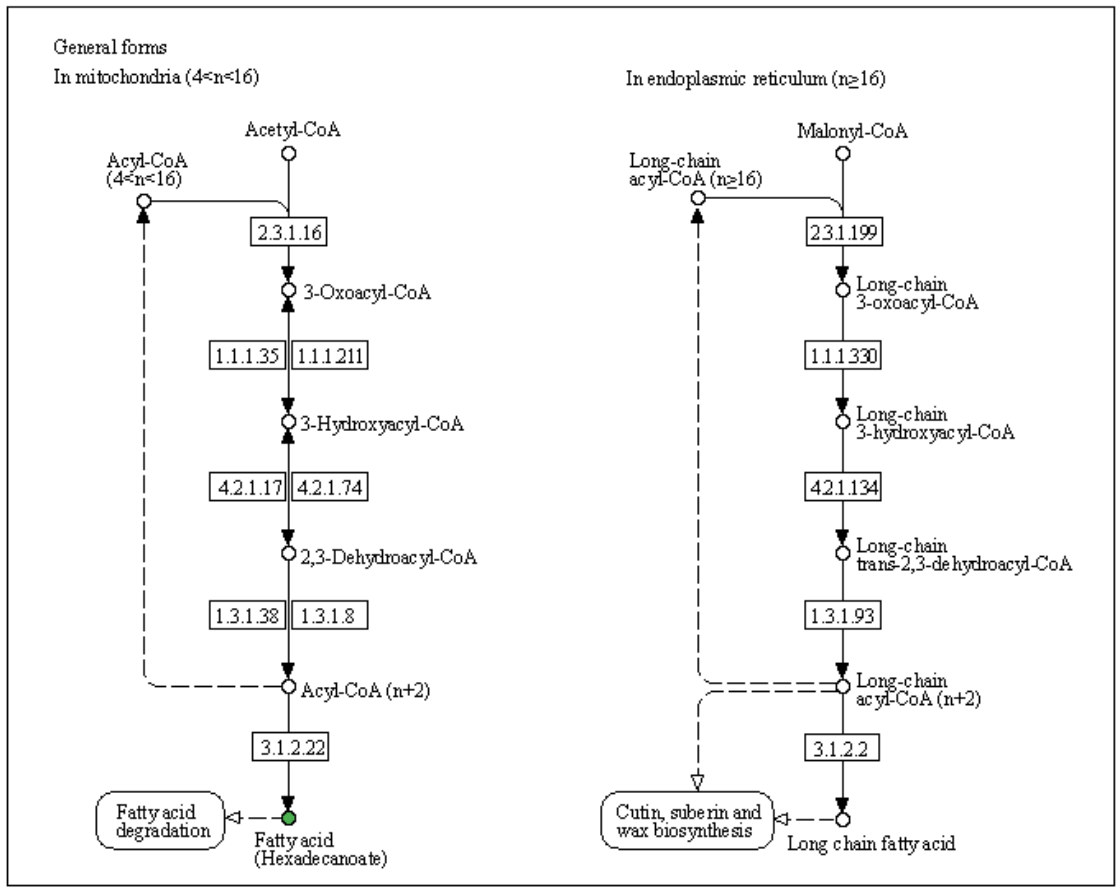

Supplement: Supplementary file 1 [file get_supplementary_file.php]
